# Supplementary material
Source: MDPI journal article supplement (https://www.mdpi.com/2571-8789/6/4/86)
Supplement: s1 [file s1]

## Supplementary Materials

**Table S1.** Coordinates of sampling sites in the study area (locations indicated in Figure 1b, c, d).

| Sample                      | Latitude         | Longitude        | Elevation(m) |
|-----------------------------|------------------|------------------|--------------|
| <b>A1 (Around the SSP)</b>  | 35° 36' 59.86" N | 45° 08' 09.73" E | 937          |
| <b>A2 (Around the SSP)</b>  | 35° 36' 59.38" N | 45° 08' 09.05" E | 932          |
| <b>A3(Around the SSP)</b>   | 35° 36' 59.38" N | 45° 08' 05.72" E | 933          |
| <b>SS1</b>                  | 35° 37' 11.95" N | 45° 08' 27.61" E | 1012         |
| <b>SS2</b>                  | 35° 37' 13.21" N | 45° 08' 26.43" E | 1017         |
| <b>SS3</b>                  | 35° 37' 05.27" N | 45° 08' 30.60" E | 981          |
| <b>SS4</b>                  | 35° 37' 04.80" N | 45° 08' 30.93" E | 979          |
| <b>SS5</b>                  | 35° 37' 11.37" N | 45° 08' 40.73" E | 1022         |
| <b>SS6</b>                  | 35° 37' 14.09" N | 45° 08' 08.06" E | 987          |
| <b>SS7</b>                  | 35° 36' 50.29" N | 45° 08' 34.81" E | 984          |
| <b>SS8</b>                  | 35° 36' 50.58" N | 45° 08' 01.92" E | 894          |
| <b>SS9</b>                  | 35° 37' 35.92" N | 45° 08' 26.80" E | 1159         |
| <b>SS10</b>                 | 35° 36' 31.18" N | 45° 08' 28.33" E | 948          |
| <b>SS11</b>                 | 35° 37' 02.17" N | 45° 09' 02.68" E | 1043         |
| <b>SS12</b>                 | 35° 37' 08.12" N | 45° 07' 44.80" E | 903          |
| <b>SS13</b>                 | 35° 36' 02.96" N | 45° 08' 52.31" E | 930          |
| <b>SS14</b>                 | 35° 37' 44.56" N | 45° 09' 24.35" E | 1066         |
| <b>SS15</b>                 | 35° 37' 42.08" N | 45° 07' 19.26" E | 999          |
| <b>SS16</b>                 | 35° 36' 16.85" N | 45° 07' 26.62" E | 815          |
| <b>SS17</b>                 | 35° 37' 02.70" N | 45° 08' 33.97" E | 975          |
| <b>SS18</b>                 | 35° 37' 01.18" N | 45° 08' 33.97" E | 969          |
| <b>SS19</b>                 | 35° 37' 01.00" N | 45° 08' 35.45" E | 966          |
| <b>SS20</b>                 | 35° 37' 01.61" N | 45° 08' 38.15" E | 968          |
| <b>SS21</b>                 | 35° 37' 01.22" N | 45° 08' 41.57" E | 978          |
| <b>SS22</b>                 | 35° 36' 59.80" N | 45° 08' 48.98" E | 1023         |
| <b>SS23</b>                 | 35° 36' 43.18" N | 45° 08' 46.28" E | 1039         |
| <b>SS24</b>                 | 35° 36' 28.76" N | 45° 08' 34.49" E | 956          |
| <b>SS25</b>                 | 35° 36' 24.08" N | 45° 08' 49.45" E | 971          |
| <b>SS26</b>                 | 35° 36' 15.46" N | 45° 08' 44.28" E | 928          |
| <b>SS27</b>                 | 35° 36' 04.23" N | 45° 08' 44.04" E | 861          |
| <b>CS1(Clean sample)</b>    | 35° 36' 00.87" N | 45° 08' 56.00" E | 924          |
| <b>CS2(Clean sample)</b>    | 35° 37' 46.51" N | 45° 09' 42.77" E | 1092         |
| <b>SR1(Limestone rock)</b>  | 35° 37' 16.29" N | 45° 08' 44.61" E | 1071         |
| <b>SR2 (Sandstone rock)</b> | 35° 35' 21.67" N | 45° 10' 59.60" E | 892          |
| <b>SR3(shale rock)</b>      | 35° 35' 21.67" N | 45° 10' 59.60" E | 892          |

**Table S2.** Trace element composition (in mg kg<sup>-1</sup>) of the studied samples.

| Sample  | Rb   | Ba    | Li   | Cs   | Be   | Sr   | Th    | U    | Zr   | P    | Sc   | V    | Cr   | Co   |
|---------|------|-------|------|------|------|------|-------|------|------|------|------|------|------|------|
| LOD     | 0.15 | 0.30  | 0.14 | 0.06 | 0.03 | 0.60 | 0.5   | 0.03 | 1.0  | 25   | 0.60 | 0.03 | 0.40 | 0.04 |
| A1      | 35.6 | 223   | 20.5 | 2.21 | 0.89 | 168  | 19    | 1.21 | 70   | 501  | 9.49 | 77.1 | 278  | 18.9 |
| A2      | 36.5 | 217   | 20.9 | 2.34 | 1.01 | 157  | 19    | 1.27 | 91   | 509  | 10.4 | 80.9 | 261  | 19.9 |
| A3      | 45.8 | 271   | 26.3 | 2.98 | 1.19 | 127  | 32    | 1.46 | 84   | 643  | 12.3 | 96.6 | 284  | 22.9 |
| SS1     | 49.7 | 262   | 31.6 | 3.19 | 1.39 | 166  | 15    | 1.45 | 113  | 502  | 13.9 | 112  | 465  | 38.2 |
| SS2     | 51.0 | 277   | 30.0 | 3.13 | 1.23 | 169  | N     | 1.43 | 111  | 458  | 13.5 | 100  | 545  | 33.1 |
| SS3     | 29.1 | 161   | 22.8 | 2.11 | 0.81 | 138  | N     | 1.11 | 69   | 387  | 10.6 | 79.5 | 314  | 29.2 |
| SS4     | 31.8 | 193   | 21.3 | 2.17 | 0.83 | 205  | 1     | 1.27 | 71   | 396  | 9.61 | 77.5 | 269  | 21.4 |
| SS5     | 7.7  | 72.5  | 11.9 | 0.48 | 0.32 | 121  | 35    | 0.51 | 25   | 213  | 8.39 | 133  | 1365 | 49.4 |
| SS6     | 63.5 | 332   | 34.6 | 4.00 | 1.62 | 111  | 21    | 1.77 | 140  | 711  | 14.0 | 128  | 358  | 31.1 |
| SS7     | 43.7 | 233   | 26.9 | 2.80 | 1.13 | 187  | 25    | 1.53 | 96   | 542  | 12.5 | 96.7 | 281  | 21.1 |
| SS8     | 14.5 | 56.3  | 14.2 | 0.83 | 0.35 | 294  | 25    | 1.06 | 89   | 282  | 10.7 | 71.6 | 692  | 34.3 |
| SS9     | 45.3 | 259   | 26.7 | 2.72 | 1.13 | 123  | N     | 1.43 | 95   | 819  | 12.0 | 93.3 | 317  | 21.5 |
| SS10    | 68.6 | 337   | 41.1 | 4.55 | 1.97 | 85.6 | N     | 1.95 | 167  | 500  | 13.0 | 144  | 314  | 28.7 |
| SS11    | 21.5 | 114   | 20.1 | 1.27 | 0.54 | 143  | N     | 0.88 | 51   | 436  | 12.7 | 93.5 | 1098 | 50.0 |
| SS12    | 49.5 | 233   | 29.7 | 3.02 | 1.20 | 147  | N     | 1.45 | 101  | 504  | 15.3 | 116  | 531  | 36.4 |
| SS13    | 62.8 | 346   | 39.0 | 4.09 | 1.85 | 106  | N     | 1.92 | 167  | 595  | 13.2 | 146  | 318  | 29.1 |
| SS14    | 49.5 | 262   | 29.3 | 3.05 | 1.25 | 72.0 | N     | 1.32 | 128  | 467  | 9.75 | 96.4 | 649  | 42.6 |
| SS15    | 45.5 | 232   | 27.1 | 2.73 | 1.21 | 120  | N     | 1.41 | 122  | 732  | 12.9 | 95.5 | 477  | 35.2 |
| SS16    | 49.6 | 283   | 30.5 | 3.20 | 1.28 | 205  | 7     | 1.55 | 114  | 1168 | 12.5 | 101  | 226  | 20.2 |
| SS17    | 39.7 | 224   | 27.1 | 2.55 | 1.07 | 200  | 4     | 1.37 | 93   | 447  | 11.8 | 91.0 | 416  | 30.9 |
| SS18    | 16.5 | 105   | 21.4 | 1.20 | 0.44 | 170  | N     | 0.78 | 35   | 245  | 11.9 | 72.4 | 789  | 49.7 |
| SS19    | 36.6 | 223   | 27.6 | 2.39 | 0.87 | 206  | N     | 1.23 | 74   | 416  | 13.2 | 84.2 | 653  | 45.8 |
| SS20    | 25.5 | 141   | 23.4 | 1.71 | 0.65 | 146  | 8     | 0.96 | 60   | 308  | 12.9 | 76.5 | 839  | 50.3 |
| SS21    | 32.3 | 135   | 25.2 | 2.01 | 0.75 | 140  | 17    | 1.23 | 68   | 445  | 15.8 | 109  | 806  | 45.9 |
| SS22    | 74.7 | 374   | 42.4 | 4.69 | 2.01 | 98.1 | N     | 2.05 | 142  | 762  | 17.6 | 142  | 307  | 29.5 |
| SS23    | 73.2 | 361   | 42.9 | 4.70 | 1.94 | 93.6 | N     | 1.99 | 172  | 578  | 18.3 | 144  | 292  | 29.2 |
| SS24    | 70.6 | 370   | 41.8 | 4.43 | 1.86 | 99.3 | N     | 2.07 | 180  | 664  | 17.8 | 139  | 366  | 29.2 |
| SS25    | 44.2 | 260   | 27.1 | 2.74 | 1.20 | 109  | 10    | 1.40 | 100  | 571  | 11.6 | 89.9 | 213  | 18.5 |
| SS26    | 68.9 | 376   | 41.3 | 4.23 | 1.80 | 118  | 5     | 2.03 | 141  | 728  | 17.4 | 139  | 304  | 28.0 |
| SS27    | 41.4 | 241   | 26.3 | 2.67 | 1.23 | 193  | N     | 1.60 | 105  | 687  | 11.2 | 89.4 | 252  | 20.1 |
| CS1     | 62.4 | 307   | 37.6 | 4.34 | 1.71 | 76.1 | 3     | 1.82 | 170  | 365  | 16.0 | 136  | 284  | 27.2 |
| CS2     | 21.7 | 124   | 15.6 | 1.31 | 0.60 | 171  | 23    | 0.92 | 54   | 415  | 11.9 | 76.1 | 909  | 46.5 |
| SR1     | 0.68 | 4.90  | 2.49 | 0.01 | 0.21 | 503  | N     | 1.08 | 21   | 64.1 | 0.38 | 11.8 | 36.6 | 1.22 |
| SR2     | 6.09 | 42.3  | 10.4 | 0.47 | 0.28 | 159  | 6     | 0.18 | 16   | 190  | 10.9 | 49.0 | 968  | 45.6 |
| SR3     | 29.6 | 72.4  | 32.9 | 1.80 | 0.65 | 116  | N     | 1.77 | 59   | 346  | 14.0 | 126  | 802  | 51.9 |
| Min     | 0.7  | 4.9   | 2.5  | 0.0  | 0.2  | 72.0 | 1.0   | 0.2  | 16.0 | 64.1 | 0.4  | 11.8 | 36.6 | 1.2  |
| Max     | 74.7 | 375.8 | 42.9 | 4.7  | 2.0  | 503  | 35.0  | 2.1  | 180. | 1168 | 18.3 | 146  | 1365 | 51.9 |
| Average | 41.3 | 221   | 27.1 | 2.6  | 1.1  | 156  | 15.3  | 1.4  | 97.0 | 503  | 12.6 | 100  | 494  | 32.4 |
| SD      | 19.7 | 103   | 9.61 | 1.26 | 0.52 | 75.9 | 10.63 | 0.44 | 44.7 | 209  | 3.24 | 30.0 | 297  | 12.0 |

Table S2. Continued

| Sample  | Ni   | Cu   | Cd   | Zn   | Mo   | Pb   | Ti   | Bi   | Sn   | Sb   | As   | S    | Cl   |
|---------|------|------|------|------|------|------|------|------|------|------|------|------|------|
| LOD     | 0.60 | 0.30 | 0.03 | 1.5  | 0.15 | 0.45 | 0.04 | 0.03 | 0.15 | 0.15 | 0.30 | 25   | -    |
| A1      | 128  | 58.3 | 0.89 | 584  | 1.14 | 532  | 0.28 | 0.23 | 11.0 | 5.07 | 7.45 | 597  | N    |
| A2      | 133  | 42.4 | 0.55 | 283  | 0.89 | 132  | 0.27 | 0.29 | 4.38 | 1.87 | 7.26 | 507  | N    |
| A3      | 145  | 45.1 | 0.57 | 240  | 1.00 | 740  | 0.37 | 0.38 | 8.77 | 6.33 | 7.53 | 444  | N    |
| SS1     | 310  | 36.2 | 0.41 | 188  | 0.88 | 16.3 | 2.07 | 0.19 | 2.40 | 0.86 | 10.6 | 242  | 1    |
| SS2     | 311  | 39.1 | 0.47 | 408  | 0.77 | 37.4 | 0.62 | 0.55 | 10.8 | 0.99 | 8.18 | 206  | N    |
| SS3     | 271  | 51.5 | 1.18 | 636  | 0.92 | 43.6 | 0.38 | 0.45 | 5.02 | 1.34 | 7.19 | 303  | N    |
| SS4     | 174  | 38.5 | 0.83 | 708  | 1.04 | 48.6 | 0.34 | 0.43 | 5.09 | 1.34 | 8.59 | 435  | N    |
| SS5     | 485  | 25.5 | 0.26 | 87.4 | 0.58 | 11.6 | 0.15 | 0.31 | 0.89 | 0.53 | 9.64 | 234  | N    |
| SS6     | 186  | 48.6 | 0.73 | 371  | 1.34 | 73.4 | 0.48 | 0.32 | 4.91 | 2.11 | 10.3 | 606  | N    |
| SS7     | 149  | 30.6 | 0.47 | 136  | 0.87 | 24.4 | 0.34 | 0.32 | 2.14 | 0.88 | 9.66 | 490  | N    |
| SS8     | 415  | 21.7 | 0.20 | 78.5 | 0.43 | 19.2 | 0.13 | 0.15 | 0.90 | 0.55 | 5.43 | 446  | N    |
| SS9     | 146  | 27.8 | 0.32 | 98.6 | 1.10 | 15.1 | 0.34 | 0.19 | 1.74 | 0.72 | 8.14 | 437  | N    |
| SS10    | 159  | 39.4 | 0.43 | 98.7 | 1.14 | 18.8 | 0.49 | 0.30 | 2.35 | 0.93 | 12.6 | 292  | N    |
| SS11    | 589  | 27.4 | 0.22 | 76.1 | 0.88 | 8.13 | 0.17 | 0.17 | 0.91 | 0.59 | 5.45 | 381  | N    |
| SS12    | 304  | 34.7 | 0.32 | 135  | 0.80 | 25.9 | 0.33 | 0.31 | 1.87 | 0.83 | 9.38 | 368  | N    |
| SS13    | 167  | 40.4 | 0.46 | 102  | 1.17 | 22.2 | 0.46 | 0.27 | 2.29 | 1.13 | 13.5 | 469  | N    |
| SS14    | 365  | 32.2 | 0.27 | 76.3 | 0.55 | 12.6 | 0.34 | 0.40 | 1.67 | 0.60 | 6.09 | 262  | N    |
| SS15    | 296  | 31.8 | 0.34 | 100  | 0.83 | 15.8 | 0.31 | 0.16 | 1.57 | 0.69 | 7.65 | 595  | N    |
| SS16    | 110  | 36.6 | 0.29 | 84.8 | 0.77 | 13.9 | 0.34 | 0.22 | 1.73 | 0.79 | 7.64 | 391  | 177  |
| SS17    | 264  | 38.6 | 0.50 | 373  | 0.76 | 31.1 | 0.27 | 0.16 | 2.65 | 0.87 | 7.39 | 294  | N    |
| SS18    | 537  | 34.9 | 0.31 | 251  | 0.56 | 19.4 | 0.13 | 0.34 | 1.62 | 0.63 | 4.33 | 220  | N    |
| SS19    | 451  | 38.2 | 0.34 | 256  | 0.70 | 20.1 | 0.24 | 0.27 | 2.21 | 0.62 | 6.11 | 247  | 2461 |
| SS20    | 544  | 34.2 | 0.20 | 119  | 0.51 | 13.0 | 0.19 | 0.17 | 1.36 | 0.44 | 5.01 | 203  | N    |
| SS21    | 501  | 81.1 | 0.34 | 158  | 0.63 | 17.4 | 0.21 | 0.10 | 1.99 | 0.66 | 9.00 | 303  | N    |
| SS22    | 161  | 49.2 | 0.48 | 175  | 1.31 | 26.2 | 0.49 | 0.24 | 2.71 | 1.06 | 10.9 | 550  | N    |
| SS23    | 152  | 47.7 | 0.44 | 147  | 1.19 | 23.6 | 0.51 | 0.68 | 2.44 | 0.96 | 12.1 | 389  | N    |
| SS24    | 155  | 48.8 | 0.41 | 131  | 1.26 | 22.5 | 0.48 | 0.37 | 2.35 | 0.97 | 11.8 | 478  | N    |
| SS25    | 94.2 | 36.7 | 0.28 | 103  | 0.83 | 16.4 | 0.32 | 0.19 | 1.63 | 0.69 | 7.23 | 364  | N    |
| SS26    | 149  | 47.9 | 0.49 | 140  | 1.26 | 24.2 | 0.48 | 0.44 | 2.48 | 1.03 | 11.5 | 641  | N    |
| SS27    | 129  | 34.7 | 0.42 | 95.3 | 0.90 | 16.5 | 0.31 | 0.11 | 1.52 | 0.75 | 8.19 | 516  | N    |
| CS1     | 148  | 44.8 | 0.36 | 106  | 1.01 | 17.6 | 0.46 | 0.33 | 2.18 | 0.96 | 11.7 | 242  | N    |
| CS2     | 473  | 31.8 | 0.19 | 70.9 | 0.58 | 7.14 | 0.16 | 0.20 | 0.87 | 0.37 | 5.47 | 380  | N    |
| SR1     | 22.2 | 11.0 | 0.84 | 43.8 | 0.23 | 0.31 | 0.02 | 0.02 | 0.18 | 0.14 | 1.41 | 202  | N    |
| SR2     | 597  | 23.0 | 0.32 | 66.4 | 0.26 | 2.21 | 0.05 | 0.13 | 0.38 | 0.21 | 1.10 | 64   | 421  |
| SR3     | 628  | 46.0 | 0.06 | 93.6 | 0.34 | 4.47 | 0.20 | 0.17 | 1.00 | 0.38 | 2.35 | 1891 | N    |
| Min     | 22.2 | 11.0 | 0.1  | 43.8 | 0.2  | 0.3  | 0.0  | N    | 0.2  | 0.1  | 1.1  | 64.5 | 1.0  |
| Max     | 628  | 81.1 | 1.2  | 708  | 1.3  | 740  | 2.1  | 0.7  | 11.0 | 6.3  | 13.5 | 1891 | 2461 |
| Average | 281  | 38.8 | 0.4  | 195  | 0.8  | 59.2 | 0.4  | 0.3  | 2.8  | 1.1  | 7.9  | 420  | 765  |
| SD      | 173  | 12.1 | 0.23 | 167  | 0.30 | 148  | 0.33 | 0.14 | 2.60 | 1.22 | 3.04 | 291  | 420  |

LOD: limits of detection; N: not detected.

**Table S3.** Enrichment factors (EF) for trace elements in studied samples calculated based on soil world average soil values [33] using Al as a reference element.

| Sample | Rb   | Ba   | Li   | Cs   | Be   | Sr   | Th          | U    | Zr   | Sc   | V    | Cr          | Co          |
|--------|------|------|------|------|------|------|-------------|------|------|------|------|-------------|-------------|
| A1     | 0.93 | 0.81 | 0.96 | 0.36 | 0.61 | 1.49 | 3.03        | 0.43 | 0.31 | 1.31 | 1.68 | <b>8.65</b> | 3.59        |
| A2     | 0.84 | 0.69 | 0.86 | 0.33 | 0.61 | 1.22 | 2.65        | 0.39 | 0.35 | 1.25 | 1.55 | <b>7.12</b> | 3.3         |
| A3     | 0.84 | 0.69 | 0.86 | 0.34 | 0.57 | 0.79 | 3.58        | 0.36 | 0.26 | 1.19 | 1.48 | <b>6.2</b>  | 3.04        |
| SS1    | 0.78 | 0.57 | 0.89 | 0.31 | 0.58 | 0.89 | 1.44        | 0.31 | 0.3  | 1.15 | 1.47 | <b>8.74</b> | 4.37        |
| SS2    | 0.84 | 0.63 | 0.89 | 0.32 | 0.54 | 0.95 | —           | 0.32 | 0.31 | 1.18 | 1.38 | <b>10.7</b> | 3.97        |
| SS3    | 0.73 | 0.55 | 1.02 | 0.33 | 0.53 | 1.17 | —           | 0.37 | 0.29 | 1.4  | 1.65 | <b>9.32</b> | 5.28        |
| SS4    | 0.85 | 0.71 | 1.01 | 0.36 | 0.58 | 1.85 | 0.16        | 0.46 | 0.32 | 1.35 | 1.72 | <b>8.52</b> | 4.13        |
| SS5    | 0.33 | 0.42 | 0.9  | 0.13 | 0.36 | 1.75 | <b>9.05</b> | 0.29 | 0.18 | 1.87 | 4.69 | <b>68.9</b> | 15.2        |
| SS6    | 0.79 | 0.57 | 0.77 | 0.31 | 0.53 | 0.47 | 1.6         | 0.3  | 0.29 | 0.93 | 1.34 | 5.33        | 2.82        |
| SS7    | 0.84 | 0.62 | 0.92 | 0.34 | 0.57 | 1.22 | 2.93        | 0.4  | 0.31 | 1.26 | 1.55 | <b>6.43</b> | 2.94        |
| SS8    | 0.32 | 0.17 | 0.56 | 0.11 | 0.2  | 2.22 | 3.38        | 0.32 | 0.33 | 1.25 | 1.33 | <b>18.3</b> | 5.52        |
| SS9    | 0.79 | 0.62 | 0.83 | 0.29 | 0.52 | 0.73 | —           | 0.34 | 0.28 | 1.1  | 1.35 | <b>6.56</b> | 2.7         |
| SS10   | 0.68 | 0.46 | 0.73 | 0.28 | 0.52 | 0.29 | —           | 0.26 | 0.28 | 0.68 | 1.19 | 3.7         | 2.07        |
| SS11   | 0.61 | 0.45 | 1.02 | 0.23 | 0.41 | 1.38 | —           | 0.34 | 0.24 | 1.9  | 2.22 | <b>37.2</b> | <b>10.3</b> |
| SS12   | 0.82 | 0.53 | 0.88 | 0.31 | 0.52 | 0.83 | —           | 0.32 | 0.28 | 1.33 | 1.59 | <b>10.5</b> | 4.36        |
| SS13   | 0.66 | 0.51 | 0.74 | 0.27 | 0.52 | 0.38 | —           | 0.27 | 0.29 | 0.73 | 1.28 | 4           | 2.23        |
| SS14   | 0.64 | 0.47 | 0.68 | 0.25 | 0.43 | 0.32 | —           | 0.23 | 0.28 | 0.67 | 1.04 | <b>10</b>   | 4.01        |
| SS15   | 0.84 | 0.59 | 0.89 | 0.31 | 0.59 | 0.75 | —           | 0.35 | 0.37 | 1.25 | 1.46 | <b>10.4</b> | 4.68        |
| SS16   | 0.82 | 0.64 | 0.9  | 0.33 | 0.56 | 1.15 | 0.7         | 0.34 | 0.31 | 1.09 | 1.38 | 4.44        | 2.41        |
| SS17   | 0.80 | 0.62 | 0.97 | 0.32 | 0.56 | 1.36 | 0.49        | 0.37 | 0.31 | 1.25 | 1.52 | <b>9.92</b> | 4.48        |
| SS18   | 0.46 | 0.4  | 1.06 | 0.21 | 0.32 | 1.6  | —           | 0.29 | 0.16 | 1.74 | 1.67 | <b>26.1</b> | <b>9.99</b> |
| SS19   | 0.78 | 0.65 | 1.04 | 0.32 | 0.49 | 1.49 | —           | 0.35 | 0.26 | 1.47 | 1.49 | <b>16.5</b> | <b>7.05</b> |
| SS20   | 0.63 | 0.48 | 1.04 | 0.27 | 0.42 | 1.23 | 1.21        | 0.32 | 0.25 | 1.69 | 1.58 | <b>24.8</b> | <b>9.04</b> |
| SS21   | 0.7  | 0.4  | 0.97 | 0.27 | 0.43 | 1.03 | 2.25        | 0.36 | 0.25 | 1.81 | 1.97 | <b>20.8</b> | 7.21        |
| SS22   | 0.84 | 0.58 | 0.85 | 0.33 | 0.59 | 0.38 | —           | 0.31 | 0.27 | 1.04 | 1.33 | 4.12        | 2.41        |
| SS23   | 0.72 | 0.49 | 0.75 | 0.29 | 0.5  | 0.31 | —           | 0.27 | 0.28 | 0.95 | 1.18 | 3.43        | 2.09        |
| SS24   | 0.74 | 0.53 | 0.78 | 0.29 | 0.51 | 0.35 | —           | 0.29 | 0.31 | 0.98 | 1.21 | 4.55        | 2.21        |
| SS25   | 0.83 | 0.67 | 0.9  | 0.32 | 0.59 | 0.69 | 1.14        | 0.35 | 0.31 | 1.14 | 1.4  | 4.75        | 2.51        |
| SS26   | 0.77 | 0.58 | 0.82 | 0.29 | 0.53 | 0.45 | 0.34        | 0.31 | 0.26 | 1.02 | 1.29 | 4.03        | 2.26        |
| SS27   | 0.69 | 0.56 | 0.79 | 0.28 | 0.54 | 1.1  | —           | 0.36 | 0.29 | 0.99 | 1.24 | 5.02        | 2.44        |

EF categories: insufficient to minimal enrichment (EF < 2), moderate enrichment (EF = 2-5), significant enrichment (EF = 5-20; indicated in bold), very high enrichment (EF = 20-40; indicated in bold red), and extremely high enrichment (EF > 40; indicated in bold purple)

Table S3. *Continued*

| Sample | Ni          | Cu          | Cd   | Zn          | Mo   | Pb          | Tl   | Bi   | Sb          | As          | Cl          |
|--------|-------------|-------------|------|-------------|------|-------------|------|------|-------------|-------------|-------------|
| A1     | <b>9.28</b> | <b>5.45</b> | 1.06 | <b>12.3</b> | 0.83 | <b>27.8</b> | 0.61 | 0.43 | <b>10.7</b> | 2.07        | —           |
| A2     | <b>8.48</b> | 3.47        | 0.58 | 5.22        | 0.57 | <b>6.06</b> | 0.51 | 0.47 | 3.45        | 1.77        | —           |
| A3     | <b>7.41</b> | 2.95        | 0.48 | 3.55        | 0.51 | <b>27.2</b> | 0.57 | 0.5  | <b>9.36</b> | 1.47        | —           |
| SS1    | <b>13.6</b> | 2.04        | 0.3  | 2.4         | 0.39 | 0.52        | 2.73 | 0.21 | 1.09        | 1.79        | —           |
| SS2    | <b>14.3</b> | 2.31        | 0.36 | 5.44        | 0.36 | 1.24        | 0.85 | 0.65 | 1.33        | 1.44        | —           |
| SS3    | <b>18.8</b> | 4.59        | 1.34 | <b>12.8</b> | 0.64 | 2.18        | 0.79 | 0.8  | 2.7         | 1.91        | —           |
| SS4    | <b>12.9</b> | 3.66        | 1.01 | <b>15.2</b> | 0.77 | 2.59        | 0.76 | 0.81 | 2.88        | 2.43        | —           |
| SS5    | <b>57.1</b> | 3.85        | 0.5  | 2.99        | 0.69 | 0.99        | 0.54 | 0.93 | 1.81        | <b>4.35</b> | —           |
| SS6    | <b>6.47</b> | 2.17        | 0.42 | 3.75        | 0.47 | 1.84        | 0.5  | 0.29 | 2.13        | 1.38        | —           |
| SS7    | <b>7.96</b> | 2.1         | 0.41 | 2.11        | 0.46 | 0.94        | 0.55 | 0.43 | 1.37        | 1.97        | —           |
| SS8    | <b>25.6</b> | 1.72        | 0.21 | 1.41        | 0.27 | 0.85        | 0.23 | 0.25 | 0.99        | 1.28        | —           |
| SS9    | <b>7.02</b> | 1.73        | 0.25 | 1.38        | 0.53 | 0.52        | 0.49 | 0.24 | 1.01        | 1.5         | —           |
| SS10   | 4.39        | 1.39        | 0.19 | 0.79        | 0.31 | 0.37        | 0.4  | 0.21 | 0.75        | 1.33        | —           |
| SS11   | <b>46.5</b> | 2.78        | 0.29 | 1.75        | 0.7  | 0.46        | 0.41 | 0.34 | 1.34        | 1.65        | —           |
| SS12   | <b>13.9</b> | 2.05        | 0.24 | 1.8         | 0.37 | 0.86        | 0.45 | 0.37 | 1.11        | 1.65        | —           |
| SS13   | 4.9         | 1.52        | 0.22 | 0.87        | 0.34 | 0.47        | 0.41 | 0.21 | 0.96        | 1.51        | —           |
| SS14   | <b>13.2</b> | 1.5         | 0.16 | 0.8         | 0.2  | 0.33        | 0.37 | 0.37 | 0.63        | 0.84        | —           |
| SS15   | <b>15.1</b> | 2.09        | 0.29 | 1.49        | 0.42 | 0.58        | 0.48 | 0.21 | 1.03        | 1.5         | —           |
| SS16   | 5.04        | 2.15        | 0.22 | 1.13        | 0.35 | 0.46        | 0.47 | 0.26 | 1.05        | 1.34        | 0.38        |
| SS17   | <b>14.7</b> | 2.76        | 0.46 | <b>6.03</b> | 0.42 | 1.25        | 0.46 | 0.23 | 1.4         | 1.57        | —           |
| SS18   | <b>41.4</b> | 3.46        | 0.4  | 5.61        | 0.43 | 1.07        | 0.3  | 0.67 | 1.42        | 1.28        | —           |
| SS19   | <b>26.6</b> | 2.89        | 0.32 | 4.39        | 0.41 | 0.85        | 0.43 | 0.4  | 1.06        | 1.38        | <b>6.88</b> |
| SS20   | <b>37.5</b> | 3.03        | 0.22 | 2.37        | 0.35 | 0.64        | 0.39 | 0.3  | 0.87        | 1.32        | —           |
| SS21   | <b>30.1</b> | <b>6.28</b> | 0.33 | 2.75        | 0.38 | 0.75        | 0.38 | 0.15 | 1.15        | 2.07        | —           |
| SS22   | <b>5.03</b> | 1.98        | 0.25 | 1.59        | 0.41 | 0.59        | 0.46 | 0.19 | 0.96        | 1.31        | —           |
| SS23   | <b>4.17</b> | 1.68        | 0.2  | 1.17        | 0.33 | 0.47        | 0.42 | 0.48 | 0.77        | 1.27        | —           |
| SS24   | <b>4.49</b> | 1.82        | 0.19 | 1.1         | 0.37 | 0.47        | 0.42 | 0.27 | 0.82        | 1.32        | —           |
| SS25   | <b>4.89</b> | 2.45        | 0.24 | 1.56        | 0.43 | 0.61        | 0.49 | 0.26 | 1.04        | 1.44        | —           |
| SS26   | <b>4.6</b>  | 1.91        | 0.25 | 1.26        | 0.39 | 0.54        | 0.45 | 0.35 | 0.93        | 1.37        | —           |
| SS27   | <b>5.96</b> | 2.07        | 0.32 | 1.28        | 0.42 | 0.55        | 0.43 | 0.14 | 1.02        | 1.45        | —           |

EF categories: insufficient to minimal enrichment (EF < 2), moderate enrichment (EF = 2-5), significant enrichment (EF = 5-20; indicated in bold), very high enrichment (EF = 20-40; indicated in bold red), and extremely high enrichment (EF > 40; indicated in bold purple)

**Table S4.** Enrichment factors (EF) for trace elements in studied samples calculated based on average values in reference soils (CS1 and CS2) using Al as a reference element.

| Sample | Rb   | Ba   | Li   | Cs   | Be   | Sr          | Th          | U    | Zr   | P    | Sc   | V    | Cr          | Co          |
|--------|------|------|------|------|------|-------------|-------------|------|------|------|------|------|-------------|-------------|
| A1     | 1.52 | 1.93 | 1.45 | 1.35 | 1.38 | <b>5.88</b> | <b>16.7</b> | 1.76 | 1.1  | 3.65 | 1.58 | 1.51 | 2.60        | 1.86        |
| A2     | 1.37 | 1.65 | 1.3  | 1.26 | 1.38 | 4.8         | <b>14.8</b> | 1.62 | 1.25 | 3.25 | 1.52 | 1.39 | 2.14        | 1.71        |
| A3     | 1.37 | 1.64 | 1.31 | 1.28 | 1.3  | 3.12        | <b>19.9</b> | 1.49 | 0.92 | 3.29 | 1.44 | 1.33 | 1.87        | 1.57        |
| SS1    | 1.28 | 1.37 | 1.35 | 1.18 | 1.31 | 3.52        | <b>8.04</b> | 1.28 | 1.07 | 2.21 | 1.4  | 1.32 | 2.63        | 2.26        |
| SS2    | 1.38 | 1.52 | 1.34 | 1.21 | 1.21 | 3.74        | -           | 1.32 | 1.1  | 2.11 | 1.43 | 1.24 | 3.23        | 2.05        |
| SS3    | 1.19 | 1.33 | 1.54 | 1.24 | 1.2  | 4.61        | -           | 1.54 | 1.03 | 2.69 | 1.69 | 1.49 | 2.81        | 2.73        |
| SS4    | 1.38 | 1.7  | 1.53 | 1.36 | 1.32 | 7.3         | 0.9         | 1.89 | 1.13 | 2.94 | 1.63 | 1.55 | 2.57        | 2.13        |
| SS5    | 0.54 | 1.02 | 1.36 | 0.48 | 0.8  | <b>6.87</b> | <b>50.4</b> | 1.22 | 0.64 | 2.52 | 2.27 | 4.21 | <b>20.7</b> | <b>7.84</b> |
| SS6    | 1.30 | 1.38 | 1.17 | 1.17 | 1.21 | 1.86        | 8.93        | 1.23 | 1.05 | 2.48 | 1.12 | 1.2  | 1.61        | 1.46        |
| SS7    | 1.37 | 1.48 | 1.4  | 1.26 | 1.29 | 4.82        | <b>16.3</b> | 1.64 | 1.1  | 2.9  | 1.53 | 1.39 | 1.94        | 1.52        |
| SS8    | 0.53 | 0.41 | 0.85 | 0.43 | 0.46 | <b>8.74</b> | <b>18.9</b> | 1.31 | 1.18 | 1.74 | 1.52 | 1.19 | 5.5         | 2.85        |
| SS9    | 1.28 | 1.49 | 1.26 | 1.11 | 1.17 | 2.87        | -           | 1.39 | 0.99 | 3.97 | 1.33 | 1.21 | 1.98        | 1.39        |
| SS10   | 1.11 | 1.11 | 1.1  | 1.06 | 1.16 | 1.14        | -           | 1.08 | 0.99 | 1.38 | 0.82 | 1.07 | 1.11        | 1.07        |
| SS11   | 1.00 | 1.07 | 1.55 | 0.85 | 0.92 | 5.43        | -           | 1.4  | 0.87 | 3.45 | 2.3  | 1.99 | 11.2        | 5.32        |
| SS12   | 1.34 | 1.27 | 1.33 | 1.17 | 1.18 | 3.26        | -           | 1.34 | 1    | 2.32 | 1.61 | 1.43 | 3.15        | 2.25        |
| SS13   | 1.08 | 1.21 | 1.12 | 1.01 | 1.17 | 1.5         | -           | 1.13 | 1.06 | 1.75 | 0.89 | 1.15 | 1.2         | 1.15        |
| SS14   | 1.05 | 1.13 | 1.03 | 0.93 | 0.97 | 1.25        | -           | 0.96 | 1    | 1.69 | 0.81 | 0.94 | 3.02        | 2.07        |
| SS15   | 1.37 | 1.41 | 1.35 | 1.18 | 1.33 | 2.96        | -           | 1.45 | 1.34 | 3.75 | 1.51 | 1.31 | 3.14        | 2.42        |
| SS16   | 1.33 | 1.55 | 1.36 | 1.24 | 1.26 | 4.53        | 3.92        | 1.43 | 1.13 | 5.37 | 1.32 | 1.24 | 1.34        | 1.25        |
| SS17   | 1.30 | 1.49 | 1.47 | 1.2  | 1.27 | 5.37        | 2.72        | 1.53 | 1.12 | 2.49 | 1.51 | 1.36 | 2.98        | 2.32        |
| SS18   | 0.75 | 0.97 | 1.61 | 0.78 | 0.72 | <b>6.31</b> | -           | 1.22 | 0.58 | 1.9  | 2.11 | 1.5  | 7.85        | 5.16        |
| SS19   | 1.27 | 1.57 | 1.59 | 1.19 | 1.1  | 5.86        | -           | 1.46 | 0.94 | 2.46 | 1.78 | 1.34 | 4.97        | 3.64        |
| SS20   | 1.03 | 1.15 | 1.57 | 1    | 0.96 | 4.83        | <b>6.73</b> | 1.34 | 0.89 | 2.13 | 2.05 | 1.42 | 7.45        | 4.67        |
| SS21   | 1.14 | 0.97 | 1.48 | 1.02 | 0.97 | 4.05        | 12.5        | 1.49 | 0.88 | 2.69 | 2.19 | 1.77 | <b>6.25</b> | 3.72        |
| SS22   | 1.37 | 1.39 | 1.29 | 1.24 | 1.34 | 1.48        | -           | 1.29 | 0.96 | 2.39 | 1.26 | 1.2  | 1.24        | 1.24        |
| SS23   | 1.18 | 1.18 | 1.14 | 1.09 | 1.14 | 1.24        | -           | 1.1  | 1.02 | 1.59 | 1.15 | 1.06 | 1.03        | 1.08        |
| SS24   | 1.2  | 1.28 | 1.18 | 1.09 | 1.16 | 1.39        | -           | 1.21 | 1.13 | 1.93 | 1.19 | 1.09 | 1.37        | 1.14        |
| SS25   | 1.35 | 1.61 | 1.37 | 1.2  | 1.33 | 2.73        | <b>6.34</b> | 1.46 | 1.12 | 2.97 | 1.38 | 1.26 | 1.43        | 1.3         |
| SS26   | 1.26 | 1.39 | 1.25 | 1.11 | 1.19 | 1.76        | 1.89        | 1.27 | 0.94 | 2.26 | 1.24 | 1.16 | 1.21        | 1.17        |
| SS27   | 1.13 | 1.33 | 1.19 | 1.05 | 1.22 | 4.32        | -           | 1.49 | 1.05 | 3.2  | 1.19 | 1.12 | 1.51        | 1.26        |

EF categories: insufficient to minimal enrichment (EF < 2), moderate enrichment (EF = 2-5), significant enrichment (EF = 5-20; indicated in bold), very high enrichment (EF = 20-40; indicated in bold red), and extremely high enrichment (EF > 40; indicated in bold purple)

Table S4. *Continued*

| Sample | Ni          | Cu   | Cd          | Zn          | Mo   | Pb          | Ti         | Bi   | Sn          | Sb          | As   | S           |
|--------|-------------|------|-------------|-------------|------|-------------|------------|------|-------------|-------------|------|-------------|
| A1     | 2.30        | 3.47 | <b>6.61</b> | <b>14.6</b> | 3.01 | <b>80.4</b> | 1.60       | 1.86 | <b>13.4</b> | <b>14.1</b> | 1.7  | <b>6.59</b> |
| A2     | 2.11        | 2.21 | 3.6         | <b>6.2</b>  | 2.06 | <b>17.5</b> | 1.36       | 2.04 | 4.69        | 4.54        | 1.45 | 4.89        |
| A3     | 1.84        | 1.88 | 2.97        | 4.21        | 1.86 | <b>78.5</b> | 1.5        | 2.19 | <b>7.53</b> | <b>12.3</b> | 1.2  | 3.43        |
| SS1    | 3.37        | 1.3  | 1.85        | 2.85        | 1.41 | 1.49        | <b>7.2</b> | 0.91 | 1.77        | 1.44        | 1.47 | 1.61        |
| SS2    | 3.55        | 1.47 | 2.22        | <b>6.47</b> | 1.29 | 3.58        | 2.25       | 2.83 | <b>8.37</b> | 1.75        | 1.18 | 1.43        |
| SS3    | 4.66        | 2.92 | <b>8.35</b> | <b>15.2</b> | 2.32 | <b>6.29</b> | 2.09       | 3.48 | <b>5.86</b> | 3.55        | 1.57 | 3.19        |
| SS4    | 3.20        | 2.33 | <b>6.28</b> | 18.1        | 2.8  | <b>7.48</b> | 2.00       | 3.52 | <b>6.34</b> | 3.79        | 2.00 | 4.88        |
| SS5    | <b>14.2</b> | 2.45 | 3.1         | 3.55        | 2.5  | 2.85        | 1.44       | 4.06 | 1.78        | 2.38        | 3.57 | 4.18        |
| SS6    | 1.61        | 1.38 | 2.59        | 4.45        | 1.7  | 5.31        | 1.32       | 1.25 | 2.88        | 2.81        | 1.13 | 3.2         |
| SS7    | 1.97        | 1.33 | 2.53        | 2.51        | 1.68 | 2.71        | 1.46       | 1.89 | 1.93        | 1.8         | 1.62 | 3.97        |
| SS8    | <b>6.34</b> | 1.1  | 1.28        | 1.67        | 0.97 | 2.46        | 0.62       | 1.07 | 0.93        | 1.31        | 1.05 | 4.18        |
| SS9    | 1.74        | 1.1  | 1.56        | 1.64        | 1.94 | 1.52        | 1.30       | 1.03 | 1.41        | 1.32        | 1.23 | 3.2         |
| SS10   | 1.09        | 0.89 | 1.2         | 0.94        | 1.14 | 1.08        | 1.06       | 0.93 | 1.09        | 0.98        | 1.09 | 1.22        |
| SS11   | <b>11.5</b> | 1.77 | 1.79        | 2.07        | 2.53 | 1.34        | 1.08       | 1.49 | 1.21        | 1.77        | 1.35 | 4.56        |
| SS12   | 3.46        | 1.3  | 1.48        | 2.14        | 1.33 | 2.48        | 1.20       | 1.62 | 1.45        | 1.46        | 1.35 | 2.56        |
| SS13   | 1.22        | 0.97 | 1.36        | 1.04        | 1.25 | 1.36        | 1.08       | 0.9  | 1.13        | 1.27        | 1.24 | 2.09        |
| SS14   | 3.27        | 0.95 | 0.99        | 0.95        | 0.72 | 0.94        | 0.98       | 1.6  | 1.01        | 0.83        | 0.69 | 1.43        |
| SS15   | 3.75        | 1.33 | 1.78        | 1.76        | 1.53 | 1.68        | 1.27       | 0.91 | 1.35        | 1.35        | 1.23 | 4.6         |
| SS16   | 1.25        | 1.37 | 1.36        | 1.34        | 1.28 | 1.33        | 1.25       | 1.11 | 1.34        | 1.39        | 1.10 | 2.71        |
| SS17   | 3.65        | 1.76 | 2.85        | <b>7.16</b> | 1.53 | 3.6         | 1.21       | 1.01 | 2.48        | 1.85        | 1.29 | 2.48        |
| SS18   | <b>10.3</b> | 2.2  | 2.46        | <b>6.67</b> | 1.57 | 3.11        | 0.80       | 2.93 | 2.11        | 1.87        | 1.05 | 2.57        |
| SS19   | <b>6.60</b> | 1.84 | 2.02        | 5.21        | 1.5  | 2.47        | 1.14       | 1.76 | 2.2         | 1.4         | 1.13 | 2.21        |
| SS20   | <b>9.30</b> | 1.93 | 1.38        | 2.82        | 1.29 | 1.86        | 1.03       | 1.29 | 1.57        | 1.15        | 1.08 | 2.12        |
| SS21   | <b>7.48</b> | 4.00 | 2.06        | 3.27        | 1.38 | 2.18        | 1.00       | 0.65 | 2.01        | 1.52        | 1.70 | 2.77        |
| SS22   | 1.25        | 1.26 | 1.54        | 1.89        | 1.48 | 1.71        | 1.22       | 0.83 | 1.43        | 1.26        | 1.07 | 2.61        |
| SS23   | 1.04        | 1.07 | 1.23        | 1.39        | 1.18 | 1.35        | 1.11       | 2.1  | 1.13        | 1.01        | 1.04 | 1.62        |
| SS24   | 1.12        | 1.16 | 1.2         | 1.31        | 1.33 | 1.36        | 1.11       | 1.19 | 1.15        | 1.07        | 1.08 | 2.11        |
| SS25   | 1.21        | 1.56 | 1.48        | 1.85        | 1.57 | 1.77        | 1.30       | 1.12 | 1.42        | 1.37        | 1.18 | 2.87        |
| SS26   | 1.14        | 1.22 | 1.54        | 1.5         | 1.41 | 1.56        | 1.18       | 1.51 | 1.29        | 1.22        | 1.12 | 3.01        |
| SS27   | 1.48        | 1.32 | 1.99        | 1.52        | 1.51 | 1.59        | 1.14       | 0.59 | 1.19        | 1.34        | 1.19 | 3.63        |

EF categories: insufficient to minimal enrichment (EF < 2), moderate enrichment (EF = 2-5), significant enrichment (EF = 5-20; indicated in bold), very high enrichment (EF = 20-40; indicated in bold red), and extremely high enrichment (EF > 40; indicated in bold purple)

**Table S5.** Enrichment factors (EF) for rare earth elements in studied samples calculated based on UCC values [34] using Al as a reference element.

| Sample      | La   | Ce   | Pr   | Nd   | Sm   | Eu   | Gd   | Tb   | Dy   | Y    | Ho   | Er   | Tm   | Yb   | Lu   |
|-------------|------|------|------|------|------|------|------|------|------|------|------|------|------|------|------|
| <b>A1</b>   | 1.61 | 1.58 | 1.74 | 1.74 | 2.02 | 2.13 | 2.13 | 1.71 | 1.91 | 1.89 | 1.88 | 1.83 | 2.15 | 1.92 | 1.95 |
| <b>A2</b>   | 1.56 | 1.52 | 1.69 | 1.64 | 2.04 | 2.19 | 1.94 | 1.70 | 1.86 | 1.83 | 1.73 | 1.78 | 2.18 | 1.86 | 1.83 |
| <b>A3</b>   | 1.48 | 1.50 | 1.61 | 1.66 | 1.98 | 1.98 | 1.95 | 1.63 | 1.78 | 1.79 | 1.80 | 1.79 | 1.99 | 1.94 | 1.79 |
| <b>SS1</b>  | 1.30 | 1.29 | 1.40 | 1.40 | 1.67 | 1.67 | 1.75 | 1.38 | 1.54 | 1.59 | 1.54 | 1.56 | 1.65 | 1.67 | 1.60 |
| <b>SS2</b>  | 1.35 | 1.32 | 1.49 | 1.49 | 1.76 | 1.85 | 1.70 | 1.47 | 1.63 | 1.62 | 1.53 | 1.51 | 1.75 | 1.65 | 1.64 |
| <b>SS3</b>  | 1.31 | 1.30 | 1.40 | 1.47 | 1.64 | 1.74 | 1.67 | 1.46 | 1.62 | 1.64 | 1.58 | 1.60 | 1.92 | 1.60 | 1.64 |
| <b>SS4</b>  | 1.47 | 1.48 | 1.59 | 1.60 | 1.89 | 1.92 | 2.01 | 1.62 | 1.77 | 1.82 | 1.71 | 1.80 | 2.02 | 1.80 | 1.82 |
| <b>SS5</b>  | 0.97 | 0.89 | 0.99 | 1.05 | 1.20 | 1.39 | 1.29 | 1.13 | 1.18 | 1.24 | 1.17 | 1.23 | 1.41 | 1.23 | 1.27 |
| <b>SS6</b>  | 1.33 | 1.38 | 1.51 | 1.49 | 1.81 | 1.86 | 1.76 | 1.56 | 1.67 | 1.71 | 1.68 | 1.57 | 1.74 | 1.73 | 1.66 |
| <b>SS7</b>  | 1.56 | 1.52 | 1.67 | 1.71 | 2.05 | 1.98 | 1.96 | 1.64 | 1.88 | 1.94 | 1.81 | 1.69 | 2.04 | 1.87 | 1.91 |
| <b>SS8</b>  | 0.66 | 0.60 | 0.68 | 0.71 | 0.89 | 0.97 | 0.86 | 0.74 | 0.84 | 0.88 | 0.77 | 0.85 | 0.91 | 0.78 | 0.78 |
| <b>SS9</b>  | 1.39 | 1.28 | 1.37 | 1.37 | 1.61 | 1.63 | 1.68 | 1.35 | 1.48 | 1.52 | 1.45 | 1.47 | 1.75 | 1.49 | 1.48 |
| <b>SS10</b> | 1.08 | 1.09 | 1.23 | 1.25 | 1.47 | 1.48 | 1.63 | 1.25 | 1.35 | 1.30 | 1.33 | 1.32 | 1.49 | 1.39 | 1.37 |
| <b>SS11</b> | 1.26 | 1.16 | 1.34 | 1.31 | 1.75 | 1.84 | 1.59 | 1.38 | 1.63 | 1.62 | 1.67 | 1.57 | 1.81 | 1.60 | 1.68 |
| <b>SS12</b> | 1.39 | 1.38 | 1.50 | 1.48 | 1.76 | 1.86 | 1.77 | 1.59 | 1.73 | 1.72 | 1.66 | 1.66 | 1.93 | 1.82 | 1.79 |
| <b>SS13</b> | 1.09 | 1.14 | 1.25 | 1.26 | 1.60 | 1.59 | 1.56 | 1.28 | 1.38 | 1.37 | 1.39 | 1.35 | 1.51 | 1.52 | 1.33 |
| <b>SS14</b> | 0.93 | 1.00 | 1.04 | 1.03 | 1.24 | 1.37 | 1.25 | 1.06 | 1.16 | 1.13 | 1.18 | 1.17 | 1.31 | 1.25 | 1.11 |
| <b>SS15</b> | 1.47 | 1.48 | 1.60 | 1.65 | 1.98 | 2.01 | 1.98 | 1.69 | 1.80 | 1.79 | 1.78 | 1.70 | 1.98 | 1.89 | 1.87 |
| <b>SS16</b> | 1.39 | 1.39 | 1.51 | 1.52 | 1.80 | 1.88 | 1.88 | 1.55 | 1.71 | 1.69 | 1.62 | 1.64 | 1.81 | 1.67 | 1.65 |
| <b>SS17</b> | 1.34 | 1.34 | 1.47 | 1.49 | 1.81 | 1.82 | 1.76 | 1.53 | 1.69 | 1.69 | 1.64 | 1.72 | 1.89 | 1.68 | 1.71 |
| <b>SS18</b> | 0.98 | 0.95 | 1.03 | 1.03 | 1.20 | 1.48 | 1.36 | 1.08 | 1.21 | 1.22 | 1.19 | 1.12 | 1.40 | 1.25 | 1.27 |
| <b>SS19</b> | 1.22 | 1.22 | 1.38 | 1.35 | 1.61 | 1.68 | 1.68 | 1.44 | 1.53 | 1.51 | 1.46 | 1.57 | 1.74 | 1.56 | 1.62 |
| <b>SS20</b> | 1.22 | 1.26 | 1.31 | 1.31 | 1.47 | 1.76 | 1.68 | 1.36 | 1.48 | 1.49 | 1.46 | 1.57 | 1.65 | 1.65 | 1.69 |
| <b>SS21</b> | 1.15 | 1.11 | 1.23 | 1.21 | 1.44 | 1.66 | 1.51 | 1.28 | 1.43 | 1.46 | 1.43 | 1.40 | 1.68 | 1.45 | 1.54 |
| <b>SS22</b> | 1.42 | 1.42 | 1.54 | 1.54 | 1.85 | 1.91 | 1.88 | 1.60 | 1.66 | 1.66 | 1.62 | 1.64 | 1.92 | 1.74 | 1.73 |
| <b>SS23</b> | 1.27 | 1.29 | 1.39 | 1.41 | 1.65 | 1.66 | 1.62 | 1.37 | 1.45 | 1.47 | 1.47 | 1.44 | 1.62 | 1.59 | 1.58 |
| <b>SS24</b> | 1.23 | 1.24 | 1.24 | 1.21 | 1.22 | 1.20 | 1.28 | 1.11 | 1.16 | 1.17 | 1.18 | 1.17 | 1.15 | 1.11 | 1.12 |
| <b>SS25</b> | 1.57 | 1.58 | 1.70 | 1.72 | 2.00 | 2.09 | 1.88 | 1.68 | 1.80 | 1.79 | 1.72 | 1.78 | 1.96 | 2.04 | 1.89 |
| <b>SS26</b> | 1.45 | 1.45 | 1.56 | 1.55 | 1.90 | 1.92 | 1.90 | 1.51 | 1.65 | 1.64 | 1.63 | 1.66 | 1.83 | 1.66 | 1.69 |
| <b>SS27</b> | 1.32 | 1.32 | 1.46 | 1.48 | 1.72 | 1.80 | 1.77 | 1.42 | 1.56 | 1.57 | 1.52 | 1.52 | 1.69 | 1.58 | 1.67 |

EF categories: insufficient to minimal enrichment (EF < 2), moderate enrichment (EF = 2-5), significant enrichment (EF = 5-20; indicated in bold), very high enrichment (EF = 20-40; indicated in bold red), and extremely high enrichment (EF >40; indicated in bold purple)



**Table S6.** Enrichment factors (EF) for rare earth elements in studied samples calculated based on average values in reference soils (CS1 and CS2) using Al as a reference element.

| Sample | La   | Ce   | Pr   | Nd   | Sm   | Eu   | Gd   | Tb   | Dy   | Y    | Ho   | Er   | Tm   | Yb   | Lu   |
|--------|------|------|------|------|------|------|------|------|------|------|------|------|------|------|------|
| A1     | 1.43 | 1.42 | 1.43 | 1.42 | 1.39 | 1.37 | 1.49 | 1.37 | 1.40 | 1.41 | 1.40 | 1.35 | 1.47 | 1.30 | 1.37 |
| A2     | 1.39 | 1.38 | 1.39 | 1.33 | 1.40 | 1.40 | 1.36 | 1.37 | 1.37 | 1.37 | 1.29 | 1.32 | 1.49 | 1.26 | 1.29 |
| A3     | 1.32 | 1.35 | 1.33 | 1.35 | 1.36 | 1.27 | 1.36 | 1.31 | 1.31 | 1.33 | 1.34 | 1.32 | 1.36 | 1.31 | 1.26 |
| SS1    | 1.16 | 1.17 | 1.16 | 1.14 | 1.15 | 1.07 | 1.22 | 1.11 | 1.14 | 1.18 | 1.15 | 1.15 | 1.12 | 1.13 | 1.13 |
| SS2    | 1.20 | 1.19 | 1.23 | 1.22 | 1.21 | 1.19 | 1.18 | 1.18 | 1.20 | 1.21 | 1.14 | 1.12 | 1.19 | 1.12 | 1.16 |
| SS3    | 1.16 | 1.18 | 1.16 | 1.20 | 1.13 | 1.12 | 1.17 | 1.17 | 1.19 | 1.23 | 1.17 | 1.18 | 1.31 | 1.08 | 1.15 |
| SS4    | 1.30 | 1.33 | 1.31 | 1.30 | 1.30 | 1.23 | 1.40 | 1.30 | 1.31 | 1.36 | 1.28 | 1.33 | 1.38 | 1.22 | 0.76 |
| SS5    | 0.86 | 0.80 | 0.81 | 0.85 | 0.82 | 0.89 | 0.90 | 0.91 | 0.87 | 0.93 | 0.87 | 0.91 | 0.96 | 0.83 | 0.90 |
| SS6    | 1.18 | 1.24 | 1.24 | 1.21 | 1.25 | 1.20 | 1.23 | 1.25 | 1.23 | 1.27 | 1.25 | 1.16 | 1.18 | 1.17 | 1.17 |
| SS7    | 1.38 | 1.37 | 1.38 | 1.39 | 1.41 | 1.27 | 1.37 | 1.32 | 1.38 | 1.45 | 1.35 | 1.25 | 1.39 | 1.27 | 1.34 |
| SS8    | 0.59 | 0.55 | 0.56 | 0.58 | 0.61 | 0.62 | 0.60 | 0.60 | 0.62 | 0.66 | 0.58 | 0.63 | 0.62 | 0.53 | 0.55 |
| SS9    | 1.23 | 1.15 | 1.12 | 1.12 | 1.11 | 1.04 | 1.17 | 1.08 | 1.09 | 1.14 | 1.08 | 1.08 | 1.19 | 1.01 | 1.04 |
| SS10   | 0.95 | 0.98 | 1.01 | 1.02 | 1.01 | 0.95 | 1.14 | 1.00 | 1.00 | 0.97 | 0.99 | 0.97 | 1.02 | 0.94 | 0.96 |
| SS11   | 1.12 | 1.05 | 1.10 | 1.06 | 1.20 | 1.18 | 1.11 | 1.11 | 1.20 | 1.21 | 1.24 | 1.16 | 1.23 | 1.08 | 1.19 |
| SS12   | 1.23 | 1.24 | 1.23 | 1.21 | 1.21 | 1.19 | 1.24 | 1.27 | 1.28 | 1.29 | 1.24 | 1.23 | 1.31 | 1.23 | 1.26 |
| SS13   | 0.97 | 1.03 | 1.03 | 1.02 | 1.10 | 1.02 | 1.09 | 1.03 | 1.01 | 1.02 | 1.04 | 1.00 | 1.03 | 1.03 | 0.94 |
| SS14   | 0.82 | 0.90 | 0.86 | 0.84 | 0.85 | 0.88 | 0.87 | 0.85 | 0.85 | 0.84 | 0.88 | 0.87 | 0.89 | 0.84 | 0.78 |
| SS15   | 1.24 | 1.27 | 1.25 | 1.27 | 1.29 | 1.22 | 1.31 | 1.29 | 1.26 | 1.26 | 1.25 | 1.19 | 1.27 | 1.21 | 1.25 |
| SS16   | 1.23 | 1.26 | 1.24 | 1.24 | 1.24 | 1.21 | 1.31 | 1.25 | 1.26 | 1.26 | 1.21 | 1.21 | 1.23 | 1.13 | 1.16 |
| SS17   | 1.19 | 1.21 | 1.21 | 1.22 | 1.25 | 1.17 | 1.23 | 1.23 | 1.25 | 1.26 | 1.23 | 1.27 | 1.29 | 1.14 | 1.20 |
| SS18   | 0.87 | 0.85 | 0.84 | 0.84 | 0.82 | 0.95 | 0.95 | 0.87 | 0.89 | 0.91 | 0.89 | 0.83 | 0.95 | 0.84 | 0.90 |
| SS19   | 1.08 | 1.10 | 1.13 | 1.10 | 1.11 | 1.08 | 1.17 | 1.16 | 1.13 | 1.13 | 1.09 | 1.16 | 1.18 | 1.06 | 1.14 |
| SS20   | 1.08 | 1.14 | 1.08 | 1.06 | 1.01 | 1.13 | 1.17 | 1.09 | 1.09 | 1.12 | 1.09 | 1.16 | 1.12 | 1.11 | 1.19 |
| SS21   | 1.02 | 1.00 | 1.01 | 0.98 | 0.99 | 1.07 | 1.05 | 1.03 | 1.05 | 1.09 | 1.07 | 1.03 | 1.15 | 0.98 | 1.08 |
| SS22   | 1.26 | 1.28 | 1.27 | 1.25 | 1.27 | 1.22 | 1.32 | 1.29 | 1.22 | 1.24 | 1.20 | 1.21 | 1.31 | 1.18 | 1.22 |
| SS23   | 1.13 | 1.16 | 1.15 | 1.15 | 1.13 | 1.06 | 1.13 | 1.10 | 1.07 | 1.10 | 1.10 | 1.06 | 1.10 | 1.08 | 1.11 |
| SS24   | 1.23 | 1.24 | 1.24 | 1.21 | 1.22 | 1.20 | 1.28 | 1.11 | 1.16 | 1.17 | 1.18 | 1.17 | 1.15 | 1.11 | 1.12 |
| SS25   | 1.39 | 1.42 | 1.40 | 1.40 | 1.37 | 1.34 | 1.31 | 1.35 | 1.32 | 1.33 | 1.28 | 1.31 | 1.33 | 1.38 | 1.33 |
| SS26   | 1.28 | 1.30 | 1.28 | 1.26 | 1.31 | 1.23 | 1.33 | 1.21 | 1.21 | 1.23 | 1.22 | 1.22 | 1.24 | 1.12 | 1.19 |
| SS27   | 1.17 | 1.19 | 1.20 | 1.20 | 1.18 | 1.15 | 1.24 | 1.14 | 1.14 | 1.18 | 1.13 | 1.12 | 1.15 | 1.07 | 1.18 |

EF categories: insufficient to minimal enrichment (EF < 2), moderate enrichment (EF = 2-5), significant enrichment (EF = 5-20; indicated in bold), very high enrichment (EF = 20-40; indicated in bold red), and extremely high enrichment (EF > 40; indicated in bold purple)

**Table S7.** Geoaccumulation indices ( $I_{\text{geo}}$ ) for trace elements in studied samples calculated based on soil world average soil values [33].

| Samples | Rb    | Ba    | Li    | Cs    | Be    | Sr    | Th    | U     | Zr    | Sc    | V     | Cr          | Co   |
|---------|-------|-------|-------|-------|-------|-------|-------|-------|-------|-------|-------|-------------|------|
| A1      | -1.07 | -1.28 | -1.03 | -2.44 | -1.68 | -0.39 | 0.63  | -2.2  | -2.68 | -0.59 | -0.22 | 2.14        | 0.87 |
| A2      | -1.04 | -1.32 | -1    | -2.36 | -1.5  | -0.49 | 0.63  | -2.13 | -2.31 | -0.45 | -0.15 | 2.05        | 0.94 |
| A3      | -0.71 | -1.01 | -0.68 | -2.01 | -1.26 | -0.79 | 1.38  | -1.93 | -2.42 | -0.21 | 0.1   | 2.17        | 1.15 |
| SS1     | -0.6  | -1.05 | -0.41 | -1.91 | -1.03 | -0.41 | 0.29  | -1.94 | -1.99 | -0.04 | 0.31  | 2.88        | 1.88 |
| SS2     | -0.56 | -0.97 | -0.49 | -1.94 | -1.21 | -0.39 | -     | -1.96 | -2.02 | -0.07 | 0.15  | <b>3.11</b> | 1.68 |
| SS3     | -1.37 | -1.76 | -0.88 | -2.51 | -1.81 | -0.68 | -     | -2.33 | -2.71 | -0.42 | -0.18 | 2.32        | 1.5  |
| SS4     | -1.24 | -1.49 | -0.98 | -2.46 | -1.78 | -0.11 | -3.62 | -2.13 | -2.66 | -0.57 | -0.22 | 2.09        | 1.05 |
| SS5     | -3.28 | -2.9  | -1.82 | -4.63 | -3.16 | -0.87 | 1.51  | -3.43 | -4.17 | -0.76 | 0.56  | <b>4.44</b> | 2.25 |
| SS6     | -0.24 | -0.71 | -0.28 | -1.59 | -0.81 | -0.99 | 0.77  | -1.65 | -1.68 | -0.02 | 0.51  | 2.51        | 1.59 |
| SS7     | -0.78 | -1.22 | -0.64 | -2.1  | -1.34 | -0.23 | 1.02  | -1.86 | -2.23 | -0.19 | 0.1   | 2.16        | 1.03 |
| SS8     | -2.37 | -3.27 | -1.57 | -3.86 | -3.03 | 0.41  | 1.02  | -2.39 | -2.34 | -0.41 | -0.33 | <b>3.46</b> | 1.73 |
| SS9     | -0.6  | -1.05 | -0.41 | -1.91 | -1.03 | -0.41 | 0.29  | -1.94 | -1.99 | -0.04 | 0.31  | 2.88        | 1.88 |
| SS10    | -0.13 | -0.69 | -0.03 | -1.4  | -0.53 | -1.37 | -     | -1.51 | -1.43 | -0.14 | 0.68  | 2.32        | 1.47 |
| SS11    | -1.8  | -2.25 | -1.06 | -3.24 | -2.39 | -0.63 | -     | -2.66 | -3.14 | -0.17 | 0.06  | <b>4.12</b> | 2.27 |
| SS12    | -0.6  | -1.22 | -0.5  | -1.99 | -1.25 | -0.58 | -     | -1.94 | -2.16 | 0.1   | 0.36  | <b>3.08</b> | 1.81 |
| SS13    | -0.26 | -0.65 | -0.11 | -1.55 | -0.62 | -1.06 | -     | -1.53 | -1.43 | -0.11 | 0.7   | 2.34        | 1.49 |
| SS14    | -0.6  | -1.05 | -0.52 | -1.98 | -1.19 | -1.61 | -     | -2.08 | -1.81 | -0.55 | 0.1   | <b>3.36</b> | 2.04 |
| SS15    | -0.72 | -1.23 | -0.63 | -2.13 | -1.23 | -0.88 | -     | -1.98 | -1.88 | -0.14 | 0.09  | 2.92        | 1.77 |
| SS16    | -0.6  | -0.94 | -0.46 | -1.91 | -1.15 | -0.1  | -0.81 | -1.84 | -1.98 | -0.18 | 0.16  | 1.84        | 0.96 |
| SS17    | -0.92 | -1.27 | -0.63 | -2.23 | -1.42 | -0.14 | -1.62 | -2.02 | -2.27 | -0.27 | 0.02  | 2.72        | 1.58 |
| SS18    | -2.18 | -2.37 | -0.97 | -3.32 | -2.71 | -0.38 | -     | -2.82 | -3.68 | -0.26 | -0.31 | <b>3.65</b> | 2.26 |
| SS19    | -1.03 | -1.29 | -0.61 | -2.33 | -1.71 | -0.1  | -     | -2.18 | -2.6  | -0.12 | -0.1  | <b>3.37</b> | 2.15 |
| SS20    | -1.55 | -1.95 | -0.84 | -2.81 | -2.14 | -0.6  | -0.62 | -2.53 | -2.91 | -0.14 | -0.23 | <b>3.74</b> | 2.28 |
| SS21    | -1.21 | -2.01 | -0.74 | -2.57 | -1.92 | -0.66 | 0.47  | -2.18 | -2.73 | 0.15  | 0.28  | <b>3.68</b> | 2.15 |
| SS22    | -0.01 | -0.54 | 0.02  | -1.35 | -0.51 | -1.17 | -     | -1.44 | -1.66 | 0.3   | 0.66  | 2.29        | 1.51 |
| SS23    | -0.03 | -0.59 | 0.03  | -1.35 | -0.56 | -1.24 | -     | -1.48 | -1.39 | 0.36  | 0.68  | 2.21        | 1.5  |
| SS24    | -0.09 | -0.55 | -0.01 | -1.44 | -0.62 | -1.15 | -     | -1.42 | -1.32 | 0.32  | 0.63  | 2.54        | 1.5  |
| SS25    | -0.76 | -1.07 | -0.63 | -2.13 | -1.25 | -1.02 | -0.3  | -1.99 | -2.17 | -0.3  | 0     | 1.76        | 0.84 |
| SS26    | -0.12 | -0.53 | -0.02 | -1.51 | -0.66 | -0.9  | -1.3  | -1.45 | -1.67 | 0.29  | 0.63  | 2.27        | 1.44 |
| SS27    | -0.86 | -1.17 | -0.67 | -2.17 | -1.21 | -0.19 | -     | -1.79 | -2.10 | -0.35 | -0.01 | 2.00        | 0.96 |

$I_{\text{geo}}$  classes: practically uncontaminated ( $I_{\text{geo}} \leq 0$ ), uncontaminated to moderately contaminated ( $0 < I_{\text{geo}} < 1$ ), moderately contaminated ( $1 < I_{\text{geo}} < 2$ ), moderately to heavily contaminated ( $2 < I_{\text{geo}} < 3$ ), heavily contaminated ( $3 < I_{\text{geo}} < 4$ ; indicated in bold), heavily to extremely contaminated ( $4 < I_{\text{geo}} < 5$ ; indicated in bold red), and extremely contaminated ( $I_{\text{geo}} > 5$ ; indicated in bold purple)

Table S7. Continued

| Samples | Ni          | Cu   | Cd    | Zn    | Mo    | Pb          | Tl    | Bi    | Sb    | As    | Cl    |
|---------|-------------|------|-------|-------|-------|-------------|-------|-------|-------|-------|-------|
| A1      | 2.24        | 1.47 | -0.88 | 2.65  | -1.25 | <b>3.83</b> | -1.69 | -2.2  | 2.45  | 0.08  | —     |
| A2      | 2.3         | 1.01 | -1.57 | 1.6   | -1.6  | 1.82        | -1.74 | -1.87 | 1.01  | 0.04  | —     |
| A3      | 2.43        | 1.10 | -1.53 | 1.37  | -1.43 | <b>4.30</b> | -1.27 | -1.45 | 2.77  | 0.09  | —     |
| SS1     | <b>3.52</b> | 0.79 | -1.99 | 1.02  | -1.61 | -1.2        | 1.2   | -2.5  | -0.12 | 0.59  | -9.15 |
| SS2     | <b>3.53</b> | 0.90 | -1.8  | 2.13  | -1.8  | -           | -0.54 | -0.93 | 0.10  | 0.21  | —     |
| SS3     | <b>3.33</b> | 1.29 | -0.48 | 2.77  | -1.55 | 0.22        | -1.24 | -1.23 | 0.53  | 0.03  | —     |
| SS4     | 2.69        | 0.88 | -0.98 | 2.93  | -1.37 | 0.37        | -1.4  | -1.3  | 0.53  | 0.29  | —     |
| SS5     | <b>4.17</b> | 0.28 | -2.67 | -0.09 | -2.21 | -1.69       | -2.55 | -1.77 | -0.81 | 0.45  | —     |
| SS6     | 2.79        | 1.21 | -1.18 | 2     | -1.01 | 0.97        | -0.92 | -1.71 | 1.18  | 0.55  | —     |
| SS7     | 2.47        | 0.54 | -1.83 | 0.55  | -1.64 | -0.62       | -1.38 | -1.73 | -0.08 | 0.45  | —     |
| SS8     | <b>3.94</b> | 0.05 | -3.01 | -0.24 | -2.63 | -0.97       | -2.83 | -2.76 | -0.75 | -0.38 | —     |
| SS9     | <b>3.52</b> | 0.79 | -1.99 | 1.02  | -1.61 | -1.20       | 1.2   | -2.5  | -0.12 | 0.59  | -9.15 |
| SS10    | 2.56        | 0.91 | -1.95 | 0.09  | -1.25 | -1.00       | -0.89 | -1.8  | 0.01  | 0.84  | —     |
| SS11    | <b>4.45</b> | 0.38 | -2.89 | -0.29 | -1.61 | -2.21       | -2.38 | -2.64 | -0.67 | -0.37 | —     |
| SS12    | <b>3.49</b> | 0.72 | -2.38 | 0.54  | -1.76 | -0.53       | -1.45 | -1.74 | -0.16 | 0.41  | —     |
| SS13    | 2.63        | 0.94 | -1.85 | 0.14  | -1.21 | -0.76       | -0.95 | -1.94 | 0.28  | 0.93  | —     |
| SS14    | <b>3.76</b> | 0.62 | -2.61 | -0.29 | -2.3  | -1.58       | -1.4  | -1.4  | -0.64 | -0.21 | —     |
| SS15    | <b>3.46</b> | 0.60 | -2.27 | 0.11  | -1.71 | -1.24       | -1.51 | -2.72 | -0.43 | 0.12  | —     |
| SS16    | 2.03        | 0.80 | -2.5  | -0.13 | -1.81 | -1.43       | -1.39 | -2.28 | -0.23 | 0.12  | -1.69 |
| SS17    | <b>3.29</b> | 0.88 | -1.72 | 2.01  | -1.83 | -0.27       | -1.71 | -2.69 | -0.10 | 0.07  | —     |
| SS18    | <b>4.32</b> | 0.73 | -2.39 | 1.43  | -2.27 | -0.95       | -2.78 | -1.63 | -0.55 | -0.7  | —     |
| SS19    | <b>4.06</b> | 0.86 | -2.3  | 1.46  | -1.95 | -0.90       | -1.88 | -1.98 | -0.58 | -0.21 | 2.11  |
| SS20    | <b>4.33</b> | 0.71 | -3.07 | 0.35  | -2.39 | -1.53       | -2.25 | -2.65 | -1.09 | -0.49 | —     |
| SS21    | <b>4.21</b> | 1.95 | -2.3  | 0.76  | -2.09 | -1.11       | -2.11 | -3.44 | -0.50 | 0.35  | —     |
| SS22    | 2.57        | 1.23 | -1.77 | 0.91  | -1.05 | -0.52       | -0.87 | -2.14 | 0.18  | 0.63  | —     |
| SS23    | 2.50        | 1.18 | -1.91 | 0.66  | -1.19 | -0.67       | -0.82 | -0.62 | 0.05  | 0.78  | —     |
| SS24    | 2.52        | 1.22 | -2.02 | 0.49  | -1.10 | -0.74       | -0.9  | -1.52 | 0.06  | 0.75  | —     |
| SS25    | 1.80        | 0.80 | -2.55 | 0.15  | -1.70 | -1.19       | -1.51 | -2.44 | -0.43 | 0.04  | —     |
| SS26    | 2.46        | 1.19 | -1.75 | 0.59  | -1.10 | -0.63       | -0.91 | -1.27 | 0.15  | 0.71  | —     |
| SS27    | 2.25        | 0.72 | -1.97 | 0.03  | -1.59 | -1.19       | -1.53 | -3.20 | -0.30 | 0.22  | —     |

$I_{\text{geo}}$  classes: practically uncontaminated ( $I_{\text{geo}} \leq 0$ ), uncontaminated to moderately contaminated ( $0 < I_{\text{geo}} < 1$ ), moderately contaminated ( $1 < I_{\text{geo}} < 2$ ), moderately to heavily contaminated ( $2 < I_{\text{geo}} < 3$ ), heavily contaminated ( $3 < I_{\text{geo}} < 4$ ; indicated in bold), heavily to extremely contaminated ( $4 < I_{\text{geo}} < 5$ ; indicated in bold red), and extremely contaminated ( $I_{\text{geo}} > 5$ ; indicated in bold purple)

**Table S8.** Geoaccumulation indices ( $I_{\text{geo}}$ ) for trace elements in studied samples calculated based on average values in reference soils (CS1 and CS2).

| Samples | Rb    | Ba    | Li    | Cs    | Be    | Sr    | Th    | U     | Zr    | P     | Sc    | V     | Cr    | Co    |
|---------|-------|-------|-------|-------|-------|-------|-------|-------|-------|-------|-------|-------|-------|-------|
| A1      | 0.13  | 0.26  | -0.19 | 0.16  | -0.03 | -0.61 | -0.86 | -0.20 | -0.21 | -0.31 | -0.91 | -0.57 | -2.30 | -1.88 |
| A2      | 0.16  | 0.23  | -0.16 | 0.25  | 0.16  | -0.71 | -0.86 | -0.12 | 0.17  | -0.29 | -0.78 | -0.50 | -2.39 | -1.81 |
| A3      | 0.49  | 0.54  | 0.17  | 0.60  | 0.39  | -1.01 | -0.11 | 0.07  | 0.05  | 0.05  | -0.54 | -0.24 | -2.26 | -1.61 |
| SS1     | 0.61  | 0.49  | 0.43  | 0.70  | 0.62  | -0.62 | -1.20 | 0.07  | 0.48  | -0.31 | -0.37 | -0.03 | -1.55 | -0.87 |
| SS2     | 0.65  | 0.58  | 0.36  | 0.67  | 0.44  | -0.60 | —     | 0.04  | 0.45  | -0.44 | -0.40 | -0.19 | -1.32 | -1.07 |
| SS3     | -0.16 | -0.21 | -0.04 | 0.10  | -0.16 | -0.89 | —     | -0.32 | -0.23 | -0.69 | -0.75 | -0.52 | -2.12 | -1.25 |
| SS4     | -0.04 | 0.05  | -0.14 | 0.14  | -0.12 | -0.32 | -5.11 | -0.13 | -0.19 | -0.65 | -0.89 | -0.56 | -2.34 | -1.70 |
| SS5     | -2.08 | -1.36 | -0.98 | -2.02 | -1.51 | -1.08 | 0.02  | -1.43 | -1.70 | -1.55 | -1.09 | 0.22  | 0.00  | -0.50 |
| SS6     | 0.96  | 0.84  | 0.56  | 1.02  | 0.84  | -1.20 | -0.72 | 0.35  | 0.79  | 0.19  | -0.35 | 0.17  | -1.93 | -1.16 |
| SS7     | 0.42  | 0.32  | 0.20  | 0.51  | 0.32  | -0.45 | -0.46 | 0.14  | 0.25  | -0.20 | -0.52 | -0.24 | -2.28 | -1.72 |
| SS8     | -1.17 | -1.72 | -0.72 | -1.25 | -1.37 | 0.20  | -0.46 | -0.39 | 0.14  | -1.14 | -0.74 | -0.67 | -0.98 | -1.02 |
| SS9     | 0.47  | 0.48  | 0.19  | 0.47  | 0.32  | -1.05 | —     | 0.05  | 0.23  | 0.40  | -0.57 | -0.29 | -2.10 | -1.70 |
| SS10    | 1.07  | 0.86  | 0.81  | 1.21  | 1.12  | -1.58 | —     | 0.49  | 1.04  | -0.32 | -0.46 | 0.34  | -2.12 | -1.28 |
| SS11    | -0.60 | -0.71 | -0.22 | -0.63 | -0.74 | -0.84 | —     | -0.65 | -0.67 | -0.51 | -0.49 | -0.29 | -0.31 | -0.48 |
| SS12    | 0.60  | 0.32  | 0.35  | 0.62  | 0.40  | -0.80 | —     | 0.07  | 0.32  | -0.30 | -0.23 | 0.02  | -1.36 | -0.94 |
| SS13    | 0.94  | 0.90  | 0.74  | 1.06  | 1.03  | -1.27 | —     | 0.47  | 1.04  | -0.06 | -0.44 | 0.35  | -2.10 | -1.26 |
| SS14    | 0.60  | 0.49  | 0.32  | 0.63  | 0.47  | -1.83 | —     | -0.07 | 0.66  | -0.41 | -0.87 | -0.24 | -1.07 | -0.71 |
| SS15    | 0.48  | 0.32  | 0.21  | 0.47  | 0.42  | -1.09 | —     | 0.03  | 0.59  | 0.23  | -0.47 | -0.26 | -1.51 | -0.99 |
| SS16    | 0.60  | 0.61  | 0.38  | 0.70  | 0.50  | -0.32 | -2.30 | 0.16  | 0.49  | 0.91  | -0.51 | -0.18 | -2.59 | -1.79 |
| SS17    | 0.28  | 0.27  | 0.21  | 0.37  | 0.24  | -0.36 | -3.11 | -0.01 | 0.20  | -0.48 | -0.60 | -0.33 | -1.71 | -1.17 |
| SS18    | -0.98 | -0.82 | -0.13 | -0.72 | -1.06 | -0.59 | —     | -0.82 | -1.21 | -1.34 | -0.58 | -0.66 | -0.79 | -0.49 |
| SS19    | 0.17  | 0.26  | 0.24  | 0.28  | -0.06 | -0.31 | —     | -0.17 | -0.13 | -0.58 | -0.44 | -0.44 | -1.06 | -0.60 |
| SS20    | -0.35 | -0.40 | 0.00  | -0.20 | -0.48 | -0.81 | -2.11 | -0.52 | -0.43 | -1.01 | -0.47 | -0.58 | -0.70 | -0.47 |
| SS21    | -0.01 | -0.46 | 0.10  | 0.03  | -0.27 | -0.87 | -1.02 | -0.17 | -0.25 | -0.48 | -0.17 | -0.06 | -0.76 | -0.60 |
| SS22    | 1.20  | 1.01  | 0.86  | 1.25  | 1.15  | -1.38 | —     | 0.57  | 0.81  | 0.29  | -0.02 | 0.31  | -2.15 | -1.24 |
| SS23    | 1.17  | 0.96  | 0.87  | 1.26  | 1.10  | -1.45 | —     | 0.53  | 1.09  | -0.11 | 0.03  | 0.34  | -2.22 | -1.25 |
| SS24    | 1.11  | 1.00  | 0.84  | 1.17  | 1.04  | -1.37 | —     | 0.58  | 1.15  | 0.09  | -0.01 | 0.28  | -1.90 | -1.25 |
| SS25    | 0.44  | 0.48  | 0.21  | 0.48  | 0.41  | -1.23 | -1.79 | 0.02  | 0.30  | -0.12 | -0.63 | -0.34 | -2.68 | -1.91 |
| SS26    | 1.08  | 1.02  | 0.82  | 1.10  | 0.99  | -1.12 | -2.79 | 0.56  | 0.80  | 0.23  | -0.04 | 0.29  | -2.17 | -1.31 |
| SS27    | 0.35  | 0.38  | 0.17  | 0.44  | 0.44  | -0.41 | —     | 0.21  | 0.37  | 0.14  | -0.67 | -0.35 | -2.43 | -1.79 |

$I_{\text{geo}}$  classes: practically uncontaminated ( $I_{\text{geo}} \leq 0$ ), uncontaminated to moderately contaminated ( $0 < I_{\text{geo}} < 1$ ), moderately contaminated ( $1 < I_{\text{geo}} < 2$ ), moderately to heavily contaminated ( $2 < I_{\text{geo}} < 3$ ), heavily contaminated ( $3 < I_{\text{geo}} < 4$ ; indicated in bold), heavily to extremely contaminated ( $4 < I_{\text{geo}} < 5$ ; indicated in bold red), and extremely contaminated ( $I_{\text{geo}} > 5$ ; indicated in bold purple)

Table S8. *Continued*

| Samples | Ni    | Cu    | Cd    | Zn    | Mo    | Pb   | Tl    | Bi    | Sn    | Sb    | As    | S     |
|---------|-------|-------|-------|-------|-------|------|-------|-------|-------|-------|-------|-------|
| A1      | -2.47 | 0.29  | 1.62  | 2.46  | 0.39  | 5.63 | 0.25  | -0.39 | 3.07  | 3.19  | -0.14 | 0.07  |
| A2      | -2.41 | -0.17 | 0.94  | 1.41  | 0.03  | 3.63 | 0.2   | -0.06 | 1.74  | 1.75  | -0.18 | -0.17 |
| A3      | -2.29 | -0.08 | 0.98  | 1.17  | 0.21  | 6.11 | 0.67  | 0.36  | 2.75  | 3.51  | -0.12 | -0.36 |
| SS1     | -1.19 | -0.4  | 0.51  | 0.82  | 0.02  | 0.61 | 3.15  | -0.69 | 0.88  | 0.63  | 0.38  | -1.23 |
| SS2     | -1.19 | -0.29 | 0.71  | 1.94  | -0.17 | 1.8  | 1.4   | 0.88  | 3.05  | 0.84  | 0     | -1.47 |
| SS3     | -1.39 | 0.11  | 2.03  | 2.58  | 0.08  | 2.02 | 0.7   | 0.59  | 1.94  | 1.27  | -0.19 | -0.91 |
| SS4     | -2.02 | -0.31 | 1.52  | 2.73  | 0.26  | 2.18 | 0.55  | 0.51  | 1.96  | 1.27  | 0.07  | -0.39 |
| SS5     | -0.55 | -0.91 | -0.16 | -0.28 | -0.57 | 0.12 | -0.6  | 0.04  | -0.55 | -0.07 | 0.23  | -1.28 |
| SS6     | -1.93 | 0.03  | 1.33  | 1.8   | 0.62  | 2.78 | 1.03  | 0.1   | 1.91  | 1.93  | 0.33  | 0.09  |
| SS7     | -2.25 | -0.64 | 0.68  | 0.36  | -0.01 | 1.19 | 0.56  | 0.08  | 0.71  | 0.67  | 0.24  | -0.22 |
| SS8     | -0.77 | -1.13 | -0.5  | -0.44 | -1    | 0.84 | -0.89 | -0.95 | -0.54 | 0     | -0.6  | -0.35 |
| SS9     | -2.28 | -0.78 | 0.13  | -0.11 | 0.34  | 0.49 | 0.54  | -0.64 | 0.41  | 0.37  | -0.01 | -0.38 |
| SS10    | -2.15 | -0.28 | 0.56  | -0.11 | 0.39  | 0.81 | 1.05  | 0.02  | 0.85  | 0.75  | 0.62  | -0.96 |
| SS11    | -0.27 | -0.8  | -0.38 | -0.48 | 0.02  | -0.4 | -0.43 | -0.83 | -0.52 | 0.08  | -0.59 | -0.58 |
| SS12    | -1.22 | -0.46 | 0.12  | 0.34  | -0.12 | 1.27 | 0.49  | 0.07  | 0.52  | 0.58  | 0.19  | -0.63 |
| SS13    | -2.09 | -0.24 | 0.65  | -0.05 | 0.43  | 1.05 | 0.99  | -0.13 | 0.81  | 1.03  | 0.72  | -0.28 |
| SS14    | -0.96 | -0.57 | -0.1  | -0.48 | -0.66 | 0.23 | 0.55  | 0.41  | 0.35  | 0.11  | -0.43 | -1.12 |
| SS15    | -1.26 | -0.58 | 0.24  | -0.08 | -0.07 | 0.56 | 0.43  | -0.91 | 0.27  | 0.32  | -0.1  | 0.06  |
| SS16    | -2.69 | -0.38 | 0.01  | -0.33 | -0.18 | 0.38 | 0.55  | -0.47 | 0.41  | 0.52  | -0.1  | -0.54 |
| SS17    | -1.42 | -0.3  | 0.79  | 1.81  | -0.2  | 1.54 | 0.23  | -0.88 | 1.02  | 0.65  | -0.15 | -0.95 |
| SS18    | -0.4  | -0.45 | 0.11  | 1.24  | -0.63 | 0.85 | -0.84 | 0.18  | 0.31  | 0.19  | -0.92 | -1.37 |
| SS19    | -0.65 | -0.32 | 0.21  | 1.27  | -0.32 | 0.91 | 0.06  | -0.17 | 0.76  | 0.16  | -0.43 | -1.21 |
| SS20    | -0.38 | -0.48 | -0.56 | 0.16  | -0.76 | 0.28 | -0.31 | -0.84 | 0.05  | -0.34 | -0.71 | -1.49 |
| SS21    | -0.50 | 0.77  | 0.21  | 0.57  | -0.46 | 0.7  | -0.16 | -1.63 | 0.61  | 0.25  | 0.13  | -0.91 |
| SS22    | -2.14 | 0.04  | 0.74  | 0.72  | 0.59  | 1.29 | 1.07  | -0.33 | 1.05  | 0.93  | 0.41  | -0.05 |
| SS23    | -2.22 | 0     | 0.6   | 0.46  | 0.45  | 1.14 | 1.13  | 1.19  | 0.9   | 0.8   | 0.57  | -0.55 |
| SS24    | -2.2  | 0.03  | 0.48  | 0.3   | 0.54  | 1.07 | 1.04  | 0.29  | 0.85  | 0.81  | 0.53  | -0.25 |
| SS25    | -2.91 | -0.38 | -0.05 | -0.04 | -0.07 | 0.61 | 0.43  | -0.63 | 0.32  | 0.32  | -0.18 | -0.65 |
| SS26    | -2.25 | 0.01  | 0.76  | 0.4   | 0.53  | 1.17 | 1.04  | 0.54  | 0.92  | 0.89  | 0.49  | 0.17  |
| SS27    | -2.46 | -0.46 | 0.54  | -0.16 | 0.05  | 0.62 | 0.41  | -1.39 | 0.22  | 0.44  | 0     | -0.14 |

$I_{\text{geo}}$  classes: practically uncontaminated ( $I_{\text{geo}} \leq 0$ ), uncontaminated to moderately contaminated ( $0 < I_{\text{geo}} < 1$ ), moderately contaminated ( $1 < I_{\text{geo}} < 2$ ), moderately to heavily contaminated ( $2 < I_{\text{geo}} < 3$ ), heavily contaminated ( $3 < I_{\text{geo}} < 4$ ; indicated in bold), heavily to extremely contaminated ( $4 < I_{\text{geo}} < 5$ ; indicated in bold red), and extremely contaminated ( $I_{\text{geo}} > 5$ ; indicated in bold purple)

**Table S9.** Geoaccumulation indices ( $I_{geo}$ ) for REEs in studied samples calculated based on UCC values [34].

| Samples | La    | Ce    | Pr    | Nd    | Sm    | Eu    | Gd    | Tb    | Dy   | Y     | Ho    | Er    | Tm    | Yb    | Lu    |
|---------|-------|-------|-------|-------|-------|-------|-------|-------|------|-------|-------|-------|-------|-------|-------|
| A1      | -1.06 | -0.98 | -1.30 | -0.69 | -0.39 | -1.17 | -0.05 | -0.42 | 1.41 | -0.28 | -1.50 | -0.61 | -1.51 | -1.13 | -1.17 |
| A2      | -0.91 | -0.84 | -1.15 | -0.59 | -0.18 | -0.94 | 0.01  | -0.23 | 1.56 | -0.13 | -1.43 | -0.45 | -1.30 | -0.98 | -1.07 |
| A3      | -0.67 | -0.54 | -0.90 | -0.25 | 0.10  | -0.77 | 0.34  | 0.02  | 1.82 | 0.15  | -1.05 | -0.13 | -1.11 | -0.60 | -0.78 |
| SS1     | -0.64 | -0.54 | -0.88 | -0.28 | 0.07  | -0.79 | 0.39  | 0.00  | 1.83 | 0.20  | -1.05 | -0.11 | -1.17 | -0.60 | -0.72 |
| SS2     | -0.65 | -0.57 | -0.86 | -0.25 | 0.08  | -0.71 | 0.28  | 0.02  | 1.84 | 0.16  | -1.13 | -0.22 | -1.15 | -0.69 | -0.76 |
| SS3     | -1.29 | -1.19 | -1.54 | -0.87 | -0.62 | -1.40 | -0.33 | -0.58 | 1.24 | -0.41 | -1.68 | -0.73 | -1.61 | -1.33 | -1.36 |
| SS4     | -1.22 | -1.10 | -1.45 | -0.84 | -0.51 | -1.35 | -0.16 | -0.53 | 1.28 | -0.35 | -1.66 | -0.66 | -1.63 | -1.25 | -1.30 |
| SS5     | -2.48 | -2.51 | -2.82 | -2.12 | -1.84 | -2.48 | -1.47 | -1.72 | 0.02 | -1.58 | -2.88 | -1.87 | -2.82 | -2.47 | -2.48 |
| SS6     | -0.27 | -0.11 | -0.45 | 0.15  | 0.52  | -0.30 | 0.74  | 0.51  | 2.28 | 0.64  | -0.60 | 0.23  | -0.76 | -0.22 | -0.34 |
| SS7     | -0.66 | -0.59 | -0.91 | -0.28 | 0.08  | -0.83 | 0.28  | -0.03 | 1.83 | 0.21  | -1.10 | -0.27 | -1.15 | -0.72 | -0.75 |
| SS8     | -2.11 | -2.13 | -2.43 | -1.76 | -1.33 | -2.07 | -1.12 | -1.39 | 0.46 | -1.14 | -2.54 | -1.48 | -2.52 | -2.19 | -2.26 |
| SS9     | -0.68 | -0.56 | -0.92 | -0.31 | 0.02  | -0.83 | 0.34  | -0.04 | 1.77 | 0.14  | -1.14 | -0.20 | -1.08 | -0.77 | -0.84 |
| SS10    | -0.24 | -0.11 | -0.41 | 0.23  | 0.55  | -0.30 | 0.97  | 0.53  | 2.31 | 0.59  | -0.60 | 0.32  | -0.64 | -0.20 | -0.28 |
| SS11    | -1.54 | -1.54 | -1.80 | -1.23 | -0.71 | -1.50 | -0.59 | -0.85 | 1.06 | -0.62 | -1.79 | -0.95 | -1.88 | -1.51 | -1.50 |
| SS12    | -0.61 | -0.52 | -0.86 | -0.27 | 0.08  | -0.71 | 0.35  | 0.13  | 1.93 | 0.25  | -1.02 | -0.08 | -1.01 | -0.55 | -0.64 |
| SS13    | -0.31 | -0.15 | -0.47 | 0.14  | 0.59  | -0.29 | 0.82  | 0.47  | 2.25 | 0.57  | -0.62 | 0.26  | -0.72 | -0.16 | -0.41 |
| SS14    | -0.85 | -0.63 | -1.03 | -0.44 | -0.08 | -0.80 | 0.19  | -0.10 | 1.70 | -0.01 | -1.16 | -0.24 | -1.22 | -0.74 | -0.97 |
| SS15    | -0.68 | -0.56 | -0.91 | -0.26 | 0.10  | -0.75 | 0.36  | 0.08  | 1.84 | 0.16  | -1.07 | -0.20 | -1.12 | -0.64 | -0.72 |
| SS16    | -0.61 | -0.49 | -0.84 | -0.22 | 0.11  | -0.69 | 0.44  | 0.11  | 1.92 | 0.23  | -1.04 | -0.09 | -1.09 | -0.67 | -0.74 |
| SS17    | -0.94 | -0.83 | -1.16 | -0.53 | -0.16 | -1.01 | 0.06  | -0.19 | 1.62 | -0.05 | -1.30 | -0.31 | -1.31 | -0.93 | -0.98 |
| SS18    | -1.86 | -1.80 | -2.15 | -1.53 | -1.23 | -1.78 | -0.78 | -1.16 | 0.67 | -0.99 | -2.24 | -1.40 | -2.22 | -1.84 | -1.87 |
| SS19    | -1.16 | -1.05 | -1.34 | -0.76 | -0.41 | -1.21 | -0.09 | -0.37 | 1.40 | -0.30 | -1.56 | -0.52 | -1.52 | -1.13 | -1.14 |
| SS20    | -1.38 | -1.23 | -1.64 | -1.03 | -0.76 | -1.37 | -0.31 | -0.67 | 1.12 | -0.54 | -1.78 | -0.75 | -1.82 | -1.27 | -1.30 |
| SS21    | -1.27 | -1.22 | -1.53 | -0.95 | -0.60 | -1.26 | -0.27 | -0.56 | 1.26 | -0.38 | -1.62 | -0.72 | -1.59 | -1.26 | -1.24 |
| SS22    | -0.03 | 0.08  | -0.26 | 0.34  | 0.70  | -0.11 | 0.99  | 0.70  | 2.42 | 0.75  | -0.50 | 0.45  | -0.46 | -0.06 | -0.13 |
| SS23    | 0.01  | 0.13  | -0.22 | 0.41  | 0.73  | -0.13 | 0.97  | 0.67  | 2.42 | 0.77  | -0.44 | 0.45  | -0.51 | 0.01  | -0.06 |
| SS24    | 0.05  | 0.15  | -0.19 | 0.41  | 0.75  | -0.04 | 1.06  | 0.60  | 2.46 | 0.78  | -0.42 | 0.51  | -0.54 | -0.03 | -0.13 |
| SS25    | -0.68 | -0.56 | -0.91 | -0.26 | 0.10  | -0.75 | 0.36  | 0.08  | 1.84 | 0.16  | -1.07 | -0.20 | -1.12 | -0.64 | -0.72 |
| SS26    | 0.01  | 0.12  | -0.23 | 0.37  | 0.75  | -0.09 | 1.02  | 0.63  | 2.43 | 0.75  | -0.47 | 0.48  | -0.52 | -0.11 | -0.14 |
| SS27    | -0.70 | -0.59 | -0.91 | -0.29 | 0.03  | -0.77 | 0.33  | -0.04 | 1.76 | 0.11  | -1.16 | -0.23 | -1.21 | -0.77 | -0.74 |

$I_{geo}$  classes: practically uncontaminated ( $I_{geo} \leq 0$ ), uncontaminated to moderately contaminated ( $0 < I_{geo} < 1$ ), moderately contaminated ( $1 < I_{geo} < 2$ ), moderately to heavily contaminated ( $2 < I_{geo} < 3$ ), heavily contaminated ( $3 < I_{geo} < 4$ ; indicated in bold), heavily to extremely contaminated ( $4 < I_{geo} < 5$ ; indicated in bold red), and extremely contaminated ( $I_{geo} > 5$ ; indicated in bold purple)

**Table S10.** Geoaccumulation Index ( $I_{\text{geo}}$ ) for REEs in studied samples calculated based on average values in reference soils (CS1 and CS2).

| Samples | La    | Ce    | Pr    | Nd    | Sm    | Eu    | Gd    | Tb    | Dy    | Y     | Ho    | Er    | Tm    | Yb    | Lu    |
|---------|-------|-------|-------|-------|-------|-------|-------|-------|-------|-------|-------|-------|-------|-------|-------|
| A1      | -0.24 | -0.21 | -0.26 | -0.23 | -0.35 | -0.20 | -0.21 | -0.25 | -0.29 | -0.25 | -0.37 | -0.27 | -0.40 | -0.40 | -0.18 |
| A2      | -0.10 | -0.06 | -0.16 | -0.03 | -0.12 | -0.14 | -0.02 | -0.09 | -0.14 | -0.18 | -0.21 | -0.06 | -0.26 | -0.26 | -0.08 |
| A3      | 0.20  | 0.19  | 0.19  | 0.25  | 0.05  | 0.19  | 0.24  | 0.16  | 0.14  | 0.20  | 0.11  | 0.13  | 0.12  | 0.12  | 0.21  |
| SS1     | 0.15  | 0.20  | 0.21  | 0.16  | 0.22  | 0.03  | 0.24  | 0.22  | 0.17  | 0.19  | 0.20  | 0.12  | 0.07  | 0.13  | 0.27  |
| SS2     | 0.14  | 0.17  | 0.23  | 0.18  | 0.23  | 0.11  | 0.13  | 0.23  | 0.18  | 0.15  | 0.12  | 0.02  | 0.09  | 0.04  | 0.23  |
| SS3     | -0.50 | -0.45 | -0.45 | -0.43 | -0.47 | -0.57 | -0.48 | -0.37 | -0.42 | -0.42 | -0.43 | -0.49 | -0.37 | -0.60 | -0.36 |
| SS4     | -0.43 | -0.36 | -0.36 | -0.40 | -0.36 | -0.53 | -0.31 | -0.31 | -0.38 | -0.36 | -0.41 | -0.42 | -0.39 | -0.52 | -0.31 |
| SS5     | -1.70 | -1.77 | -1.72 | -1.69 | -1.68 | -1.66 | -1.62 | -1.50 | -1.64 | -1.59 | -1.63 | -1.63 | -1.58 | -1.74 | -1.49 |
| SS6     | 0.51  | 0.63  | 0.65  | 0.58  | 0.67  | 0.52  | 0.59  | 0.72  | 0.62  | 0.63  | 0.65  | 0.47  | 0.48  | 0.51  | 0.65  |
| SS7     | 0.13  | 0.15  | 0.18  | 0.16  | 0.23  | -0.01 | 0.12  | 0.18  | 0.18  | 0.19  | 0.15  | -0.04 | 0.09  | 0.01  | 0.24  |
| SS8     | -1.39 | -1.34 | -1.32 | -1.18 | -1.25 | -1.27 | -1.17 | -1.20 | -1.15 | -1.29 | -1.24 | -1.28 | -1.46 | -1.46 | -1.27 |
| SS9     | 0.19  | 0.17  | 0.13  | 0.17  | -0.01 | 0.19  | 0.18  | 0.12  | 0.13  | 0.11  | 0.04  | 0.16  | -0.04 | -0.04 | 0.15  |
| SS10    | 0.63  | 0.69  | 0.66  | 0.71  | 0.52  | 0.82  | 0.74  | 0.66  | 0.57  | 0.65  | 0.55  | 0.60  | 0.53  | 0.53  | 0.71  |
| SS11    | -0.75 | -0.80 | -0.71 | -0.79 | -0.56 | -0.68 | -0.74 | -0.64 | -0.60 | -0.63 | -0.54 | -0.71 | -0.65 | -0.78 | -0.51 |
| SS12    | 0.18  | 0.23  | 0.23  | 0.17  | 0.23  | 0.11  | 0.20  | 0.35  | 0.27  | 0.24  | 0.23  | 0.15  | 0.23  | 0.18  | 0.35  |
| SS13    | 0.48  | 0.60  | 0.62  | 0.58  | 0.74  | 0.53  | 0.66  | 0.68  | 0.59  | 0.56  | 0.63  | 0.50  | 0.52  | 0.57  | 0.58  |
| SS14    | -0.06 | 0.12  | 0.06  | 0.00  | 0.07  | 0.02  | 0.04  | 0.11  | 0.04  | -0.02 | 0.09  | 0.00  | 0.02  | -0.02 | 0.02  |
| SS15    | 0.11  | 0.18  | 0.18  | 0.17  | 0.25  | 0.07  | 0.21  | 0.29  | 0.18  | 0.14  | 0.18  | 0.03  | 0.11  | 0.09  | 0.27  |
| SS16    | 0.18  | 0.25  | 0.25  | 0.21  | 0.26  | 0.14  | 0.29  | 0.32  | 0.26  | 0.22  | 0.21  | 0.14  | 0.14  | 0.06  | 0.25  |
| SS17    | -0.15 | -0.08 | -0.07 | -0.09 | 0.00  | -0.19 | -0.09 | 0.02  | -0.03 | -0.06 | -0.05 | -0.07 | -0.07 | -0.20 | 0.02  |
| SS18    | -1.06 | -1.06 | -1.10 | -1.07 | -0.96 | -0.93 | -0.95 | -0.99 | -1.00 | -0.99 | -1.16 | -0.98 | -1.11 | -1.11 | -0.88 |
| SS19    | -0.31 | -0.25 | -0.32 | -0.26 | -0.39 | -0.24 | -0.15 | -0.26 | -0.31 | -0.31 | -0.29 | -0.28 | -0.40 | -0.40 | -0.15 |
| SS20    | -0.49 | -0.55 | -0.59 | -0.61 | -0.55 | -0.46 | -0.46 | -0.54 | -0.55 | -0.53 | -0.52 | -0.58 | -0.54 | -0.54 | -0.31 |
| SS21    | -0.48 | -0.48 | -0.44 | -0.52 | -0.45 | -0.44 | -0.42 | -0.35 | -0.39 | -0.39 | -0.37 | -0.48 | -0.36 | -0.53 | -0.25 |
| SS22    | 0.76  | 0.82  | 0.83  | 0.78  | 0.85  | 0.71  | 0.84  | 0.92  | 0.76  | 0.74  | 0.75  | 0.69  | 0.77  | 0.67  | 0.86  |
| SS23    | 0.80  | 0.88  | 0.87  | 0.84  | 0.88  | 0.69  | 0.82  | 0.88  | 0.76  | 0.76  | 0.81  | 0.69  | 0.72  | 0.74  | 0.93  |
| SS24    | 0.84  | 0.89  | 0.90  | 0.84  | 0.90  | 0.79  | 0.91  | 0.81  | 0.81  | 0.76  | 0.83  | 0.75  | 0.70  | 0.70  | 0.86  |
| SS25    | 0.17  | 0.25  | 0.25  | 0.21  | 0.24  | 0.11  | 0.11  | 0.25  | 0.15  | 0.12  | 0.11  | 0.07  | 0.07  | 0.17  | 0.26  |
| SS26    | 0.80  | 0.87  | 0.86  | 0.81  | 0.91  | 0.73  | 0.87  | 0.85  | 0.77  | 0.74  | 0.78  | 0.72  | 0.72  | 0.62  | 0.85  |
| SS27    | 0.09  | 0.15  | 0.18  | 0.15  | 0.18  | 0.05  | 0.18  | 0.17  | 0.10  | 0.09  | 0.09  | 0.01  | 0.03  | -0.04 | 0.25  |

$I_{\text{geo}}$  classes: practically uncontaminated ( $I_{\text{geo}} \leq 0$ ), uncontaminated to moderately contaminated ( $0 < I_{\text{geo}} < 1$ ), moderately contaminated ( $1 < I_{\text{geo}} < 2$ ), moderately to heavily contaminated ( $2 < I_{\text{geo}} < 3$ ), heavily contaminated ( $3 < I_{\text{geo}} < 4$ ; indicated in bold), heavily to extremely contaminated ( $4 < I_{\text{geo}} < 5$ ; indicated in bold red), and extremely contaminated ( $I_{\text{geo}} > 5$ ; indicated in bold purple)
